# Supplementary material for: Analysis of RNA nearest neighbor parameters reveals interdependencies and quantifies the uncertainty in RNA secondary structure prediction
Source: PubMed Central journal article supplement — RNA. 2018 Nov;24(11):1568–82. doi: 10.1261/rna.065102.117 (PMC6191722; doi:10.1261/rna.065102.117), 2018-11
Supplement: supp_065102.117_Supplemental_Figures_and_Tables.pdf [file supp_065102.117_Supplemental_Figures_and_Tables.pdf]

## Supplemental Figures

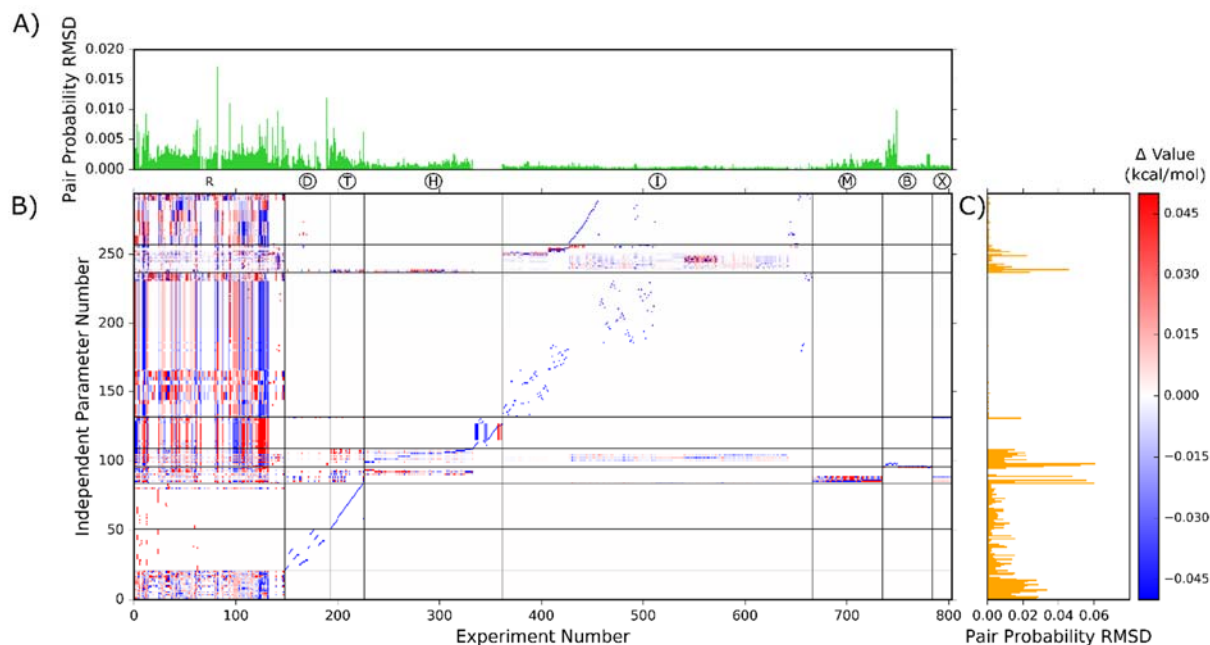

**Supplemental Figure S1: Experiment Mapping.** This figure shows the effect of perturbing each single experiment based on the experimental error. A) Mean base pair probability RMSD, averaged between  $\pm 3\sigma$  perturbations of the experimental values. The x-axis, which is shared with subplot B, shows the experiment number. This shows how perturbing a single experiment and then propagating the perturbation through the nearest neighbor parameters values alters the predicted base pairing probabilities. B) The impact of changing an individual experimental value by  $-3\sigma$  on the parameter values. Independent parameters are along the y-axis, organized by motif type, and the experiment number is shown on the x-axis. This shows how perturbing each experiment perturbs the nearest neighbor parameters. C) Mean base pair probability RMSD, averaged between  $\pm 3\sigma$  perturbations of the parameter values. Parameter indices are along the y-axis, grouped by parameter type and shared with subplot B. An interactive version of this figure is available at <http://rna.urmc.rochester.edu/publications.html>.

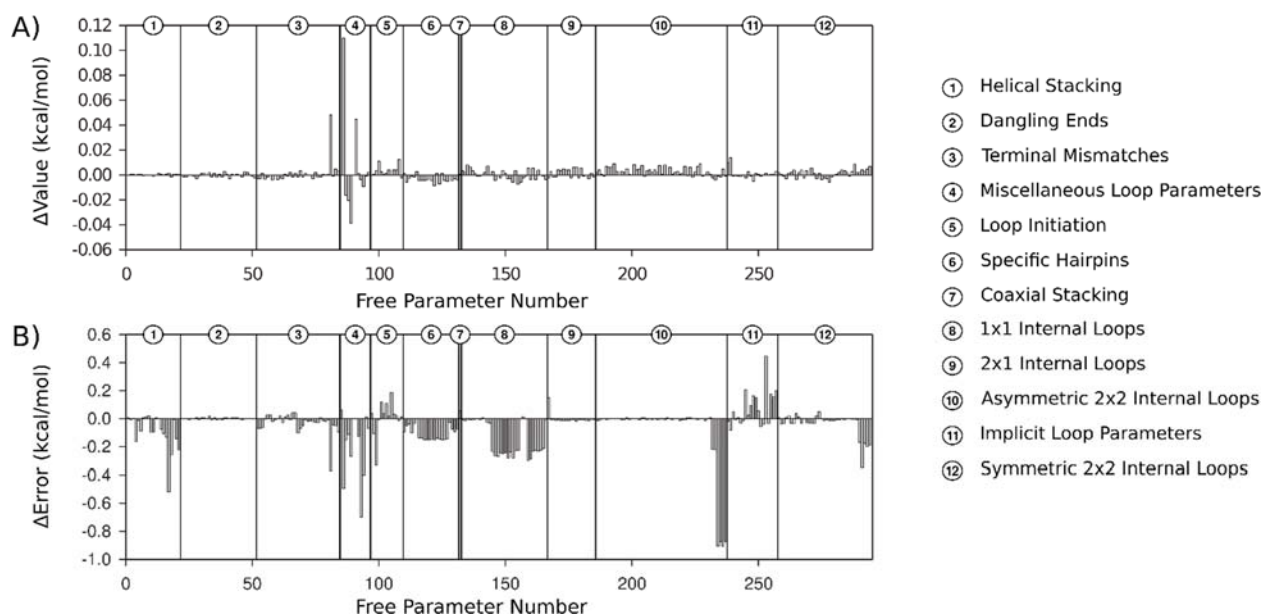

Supplemental Figure S2: Average parameter values and observed parameter standard deviations. Randomly perturbed experiment values were used to generate 100,000 parameter sets. A) The difference between the average values of the parameters across all 100,000 parameter sets and the values calculated using unmodified experiment values is plotted against parameter index. B) The difference between the errors calculated by the propagation of uncertainties and the observed standard deviations for each free parameter is plotted against parameter index.

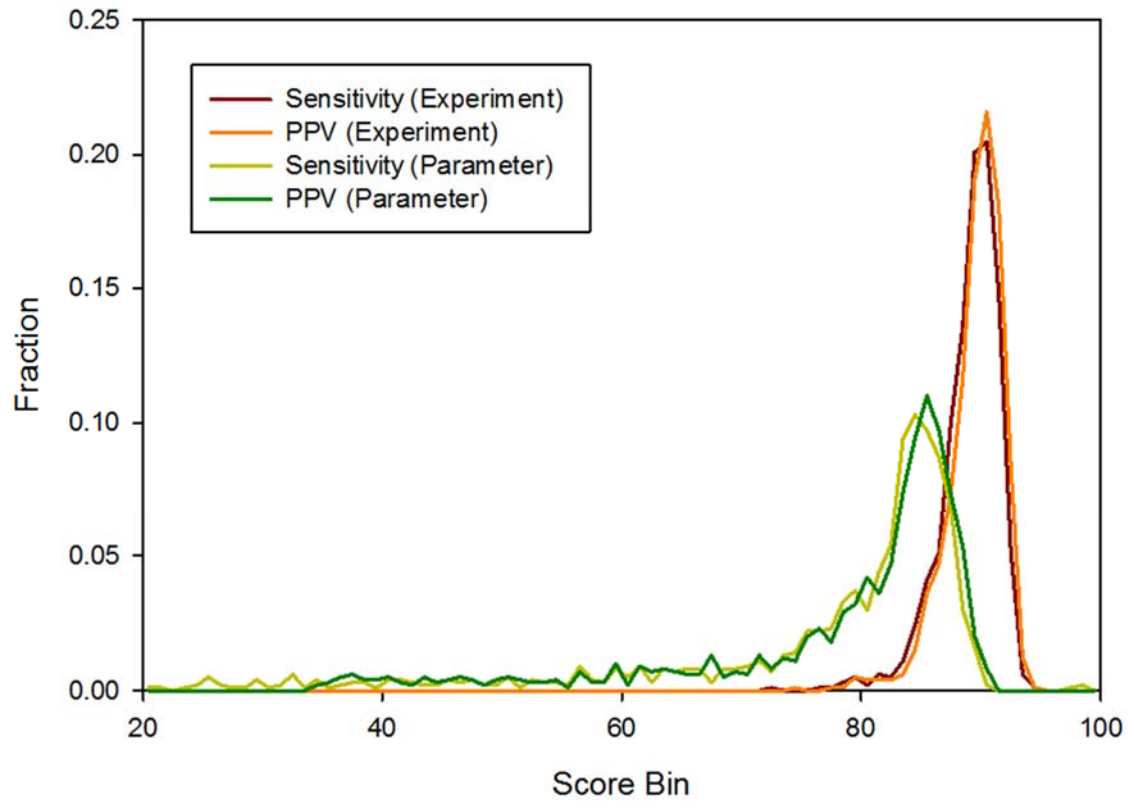

Supplemental Figure S3: Score distributions for perturbed parameter sets. The average sensitivity and positive predictive value was calculated for each perturbed parameter set compared against predictions made with an unperturbed parameter set. Parameter sets were generated by either randomly perturbing every free parameter value independently or by randomly perturbing every experiment value within experimental uncertainty. 1,000 parameter sets were evaluated for both classes.

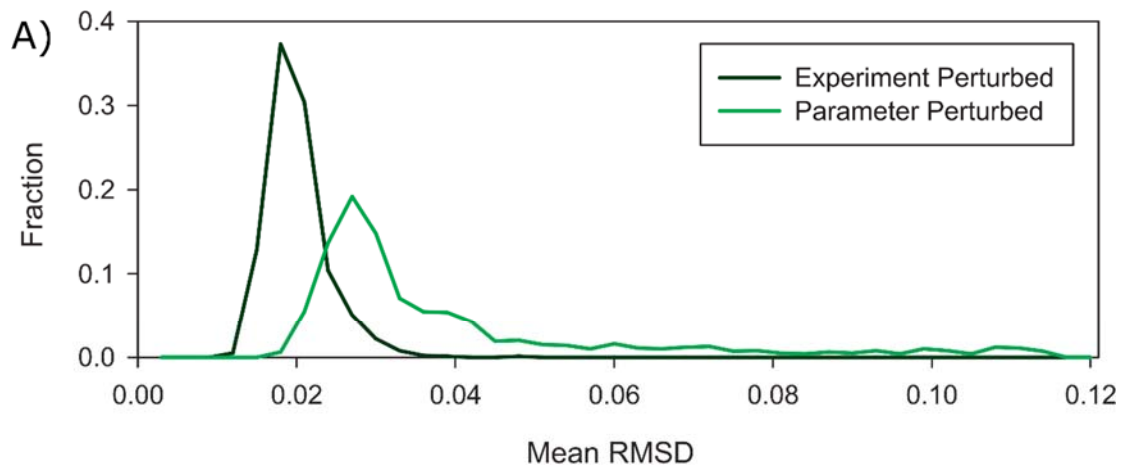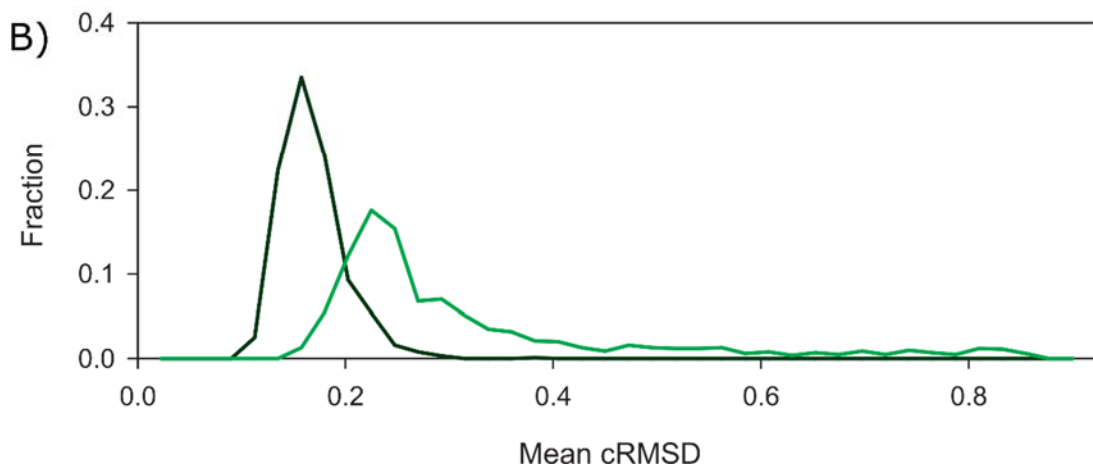

Supplemental Figure S4: Base pair probability RMSD distributions for perturbed parameter sets. Parameter sets were generated by either randomly perturbing every free parameter value independently or by randomly perturbing every experimental value within experimental uncertainty. A) The mean base pair probability RMSD across 1650 sequences was calculated for each parameter set compared against predictions made with an unperturbed parameter set. B) The mean base pair probability length-corrected RMSD across 1650 sequences was calculated for each parameter set compared against predictions made with an unperturbed parameter set. 1,000 parameter sets were evaluated for both classes.

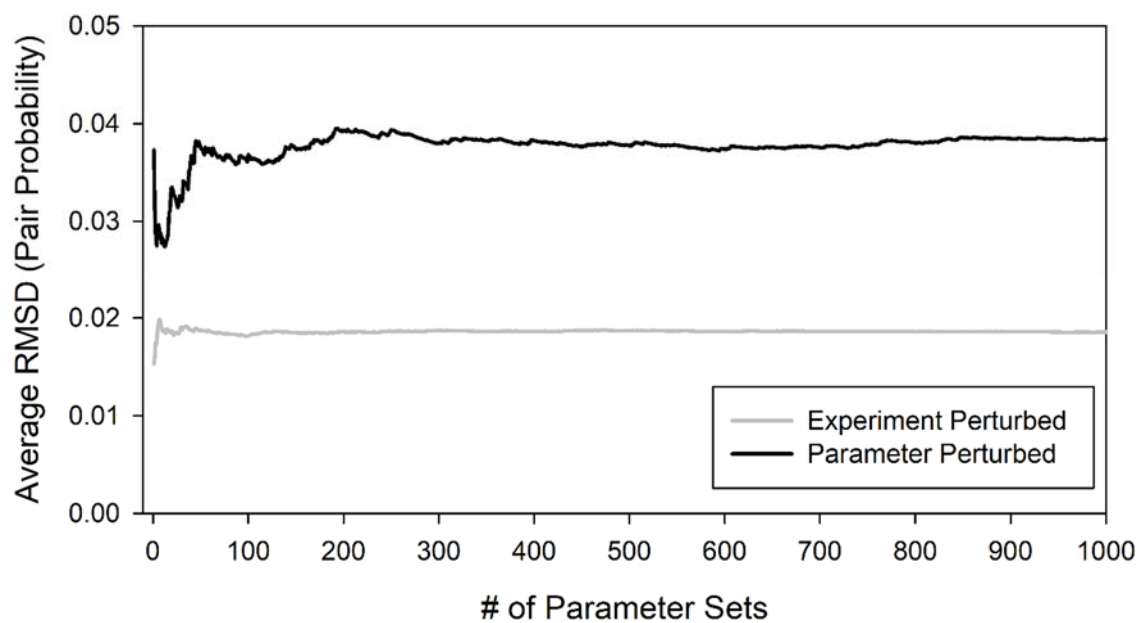

Supplemental Figure S5: Convergence of mean RMSD calculations. The cumulative mean average RMSD is plotted as the number of parameter sets is increased. The convergence of the values for both data tables generated by simultaneously perturbing all free nearest neighbor parameter values and data tables generated by perturbing all experiment values within experimental uncertainty demonstrates that sufficient numbers of data table sets have been sampled for both types.

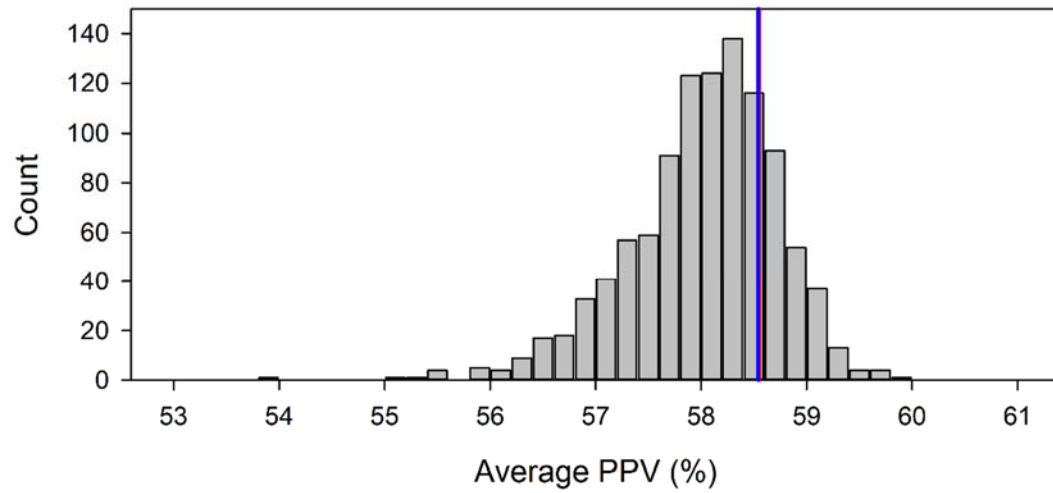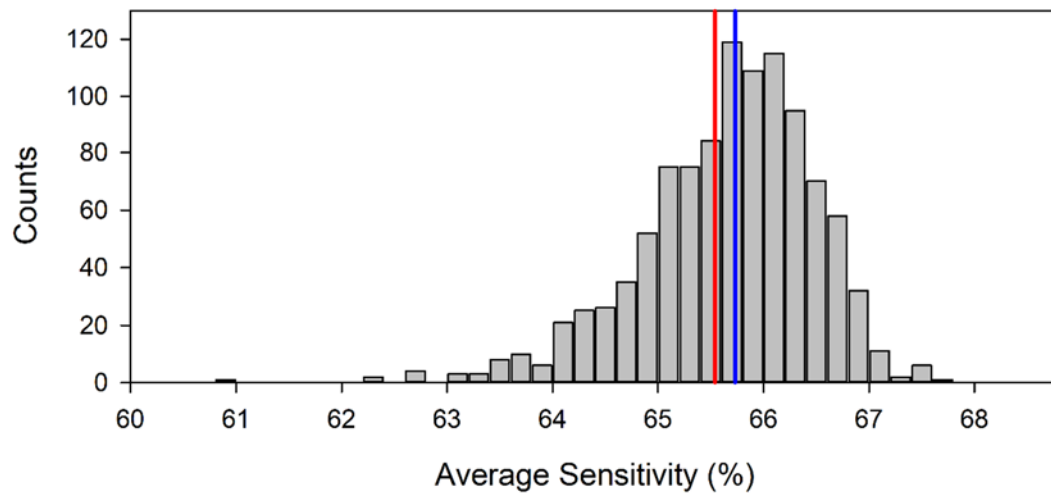

Supplemental Figure S6: Accuracy distributions for randomly perturbed parameter sets. 1000 parameter sets were generated by randomly perturbing optical melting values within experimental uncertainty. The parameter sets were then benchmarked by predicting secondary structures for 1,450 sequences of known structure. The average positive predictive value (PPV) and sensitivity scores across the RNA families are plotted (A and B respectively). The red line indicates the score for the unperturbed parameter set and the blue line indicates the score of the “average” parameter set.

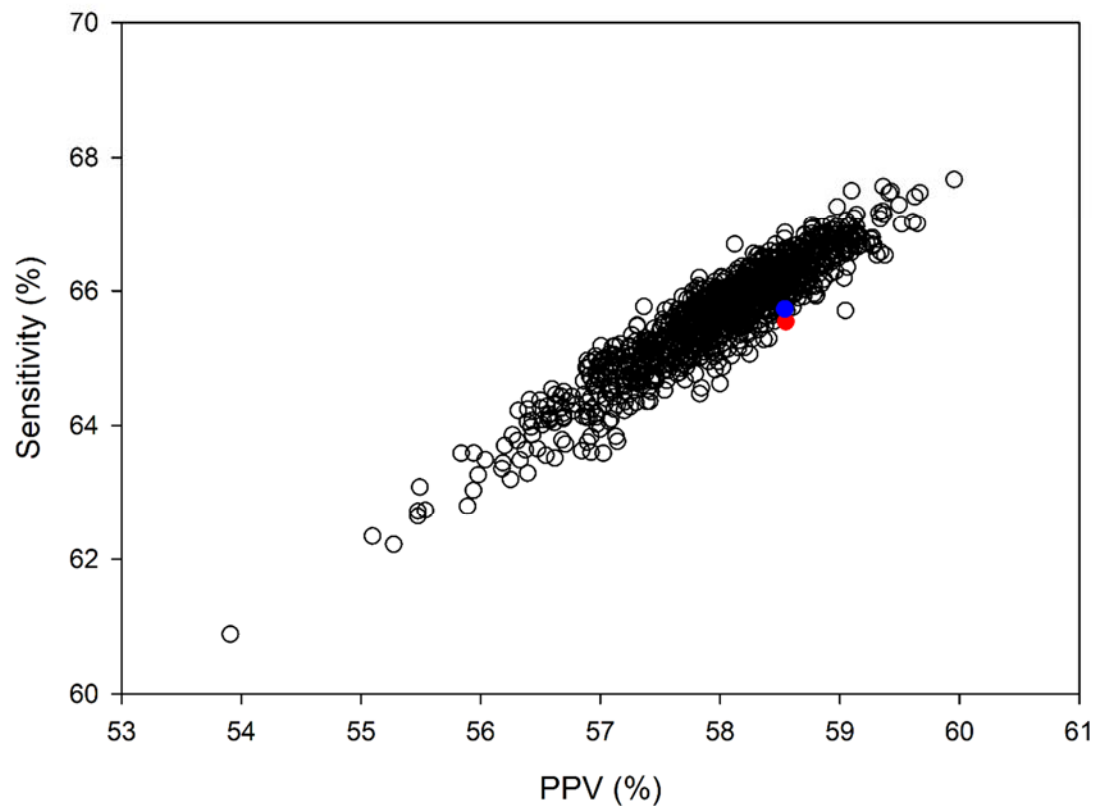

Supplemental Figure S7: Accuracy scores for randomly perturbed parameter sets. 1000 parameter sets were generated by randomly perturbing optical melting values within experimental uncertainty. The parameter sets were then benchmarked by predicting secondary structures for 1,450 sequences of known structure. The sensitivities are plotted against PPVs, where the predicted structures are scored against the known structures. Each data point represents the scores for a single parameter set, with the red data point illustrating the performance of the unperturbed parameter set and the blue dot representing the scores for the “average” parameter set.

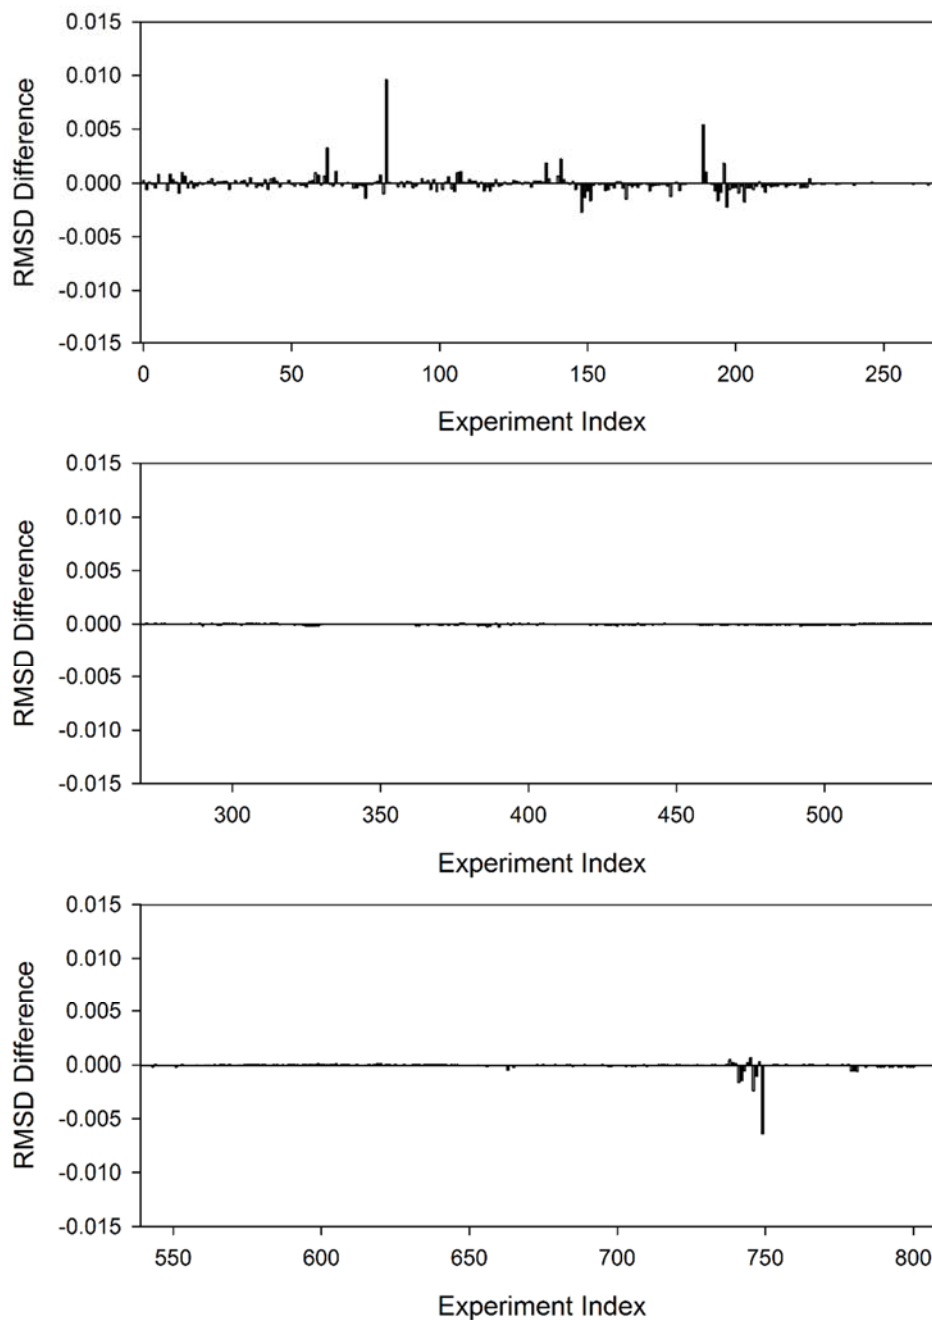

Supplemental Figure S8: RMSD difference between positive and negative  $\Delta G$  perturbations. Experiment indices are along the x-axis, organized by structure type. Difference in Mean base pair probability RMSD for the entire sequence archive except randomized sequences for +3 and -3  $\sigma$  perturbations. The details of each experiment are available in the Supplemental Tables S1-S8.



Supplementary Table 1: Helical Duplex Experiment List

Note: The top strand is shown 5' to 3'. The bottom strand is shown 3' to 5'.

| Index | ID# | Duplex                 | Folding Free Energy Change (kcal/mol) | Reference |
|-------|-----|------------------------|---------------------------------------|-----------|
| 1     | R1  | UCAUGA<br>AGUACU       | -4.30                                 | (1)       |
| 2     | R3  | CAAAAAAG<br>GUUUUUUC   | -4.10                                 | (2)       |
| 3     | R4  | CAAAAAAAG<br>GUUUUUUUC | -5.00                                 | (2)       |
| 4     | R5  | CCGG<br>GGCC           | -4.55                                 | (3)       |
| 5     | R6  | ACCGGU<br>UGGCCA       | -8.48                                 | (3)       |
| 6     | R8  | GGCC<br>CCGG           | -5.37                                 | (4)       |
| 7     | R9  | GGCC<br>CCGG           | -5.90                                 | (4)       |
| 8     | R12 | GGCC<br>CCGG           | -5.32                                 | (5)       |
| 9     | R14 | AGGCCU<br>UCCGGA       | -8.50                                 | (5)       |
| 10    | R15 | CGGCCG<br>GCCGGC       | -9.90                                 | (5)       |
| 11    | R18 | GCCGGC<br>CGGCCG       | -11.22                                | (5)       |
| 12    | R19 | UCCGGA<br>AGGCCU       | -7.86                                 | (5)       |
| 13    | R20 | GCGC<br>CGCG           | -4.63                                 | (6)       |
| 14    | R21 | GCGCGC<br>CGCGCG       | -10.60                                | (6)       |
| 15    | R22 | CGCGCG<br>GCGCGC       | -9.06                                 | (6)       |
| 16    | R24 | AUGCGU<br>UGCGUA       | -4.22                                 | (7)       |
| 17    | R25 | AUGCGCGU<br>UGCGCGUA   | -9.31                                 | (7)       |

|    |     |                      |        |     |
|----|-----|----------------------|--------|-----|
| 18 | R26 | AUGCGUAU<br>UAUGCGUA | -5.27  | (7) |
| 19 | R27 | AUGUGCAU<br>UACGUGUA | -6.17  | (7) |
| 20 | R28 | GCUGGC<br>CGGUCG     | -6.47  | (7) |
| 21 | R29 | GGCGUC<br>CUGCGG     | -4.67  | (7) |
| 22 | R30 | CUGCGG<br>GGCGUC     | -4.31  | (7) |
| 23 | R31 | CGGCUG<br>GUCGGC     | -5.55  | (7) |
| 24 | R32 | AUGCAU<br>UACGUA     | -4.73  | (7) |
| 25 | R33 | AUGCGCAU<br>UACGCGUA | -10.19 | (7) |
| 26 | R34 | AUACGUAU<br>UAUGCAUA | -6.57  | (7) |
| 27 | R35 | AUGUACAU<br>UACAUGUA | -6.49  | (7) |
| 28 | R36 | GCUAGC<br>CGAUCG     | -7.89  | (7) |
| 29 | R37 | GACGUC<br>CUGCAG     | -7.24  | (7) |
| 30 | R38 | CUGCAG<br>GACGUC     | -7.11  | (7) |
| 31 | R39 | CAGCUG<br>GUCGAC     | -6.72  | (7) |
| 32 | R40 | UGGCCG<br>GCCGGU     | -8.56  | (8) |
| 33 | R41 | UCCGGG<br>GGGCCU     | -7.44  | (8) |
| 34 | R42 | GCCGGU<br>UGGCCG     | -9.17  | (8) |
| 35 | R43 | GGCGCU<br>UCGCGG     | -8.42  | (8) |
| 36 | R44 | GCAUGC<br>CGUACG     | -7.34  | (9) |
| 37 | R45 | GUGCAC<br>CACGUG     | -7.65  | (9) |
| 38 | R46 | GUCUAGAC<br>CAGAUCUG | -10.09 | (9) |

|    |     |                      |        |      |
|----|-----|----------------------|--------|------|
| 39 | R47 | GAUUAUC<br>CUAUUAG   | -6.05  | (9)  |
| 40 | R48 | GUAUAUAC<br>CAUAUAG  | -5.99  | (9)  |
| 41 | R49 | GAGAGA<br>CUCUCU     | -6.86  | (9)  |
| 42 | R50 | AGAGAGAG<br>UCUCUCUC | -11.14 | (9)  |
| 43 | R51 | AAUGCAUU<br>UUACGUAA | -7.17  | (9)  |
| 44 | R52 | UAUGCAUA<br>AUACGUAU | -7.22  | (9)  |
| 45 | R53 | GAUGCAUC<br>CUACGUAG | -10.18 | (9)  |
| 46 | R54 | CAUGCAUG<br>GUACGUAC | -9.72  | (9)  |
| 47 | R55 | AGAUUUCU<br>UCUAUAGA | -6.50  | (10) |
| 48 | R56 | AUCUAGAU<br>UAGAUCUA | -7.17  | (10) |
| 49 | R57 | AACUAGUU<br>UUGAUCAA | -7.15  | (10) |
| 50 | R58 | AGUUAACU<br>UCAAUUGA | -6.19  | (10) |
| 51 | R59 | ACUUAAGU<br>UGAAUUCA | -6.26  | (10) |
| 52 | R60 | GAACGUUC<br>CUUGCAAG | -9.39  | (10) |
| 53 | R61 | GUUCGAAC<br>CAAGCUUG | -8.76  | (10) |
| 54 | R62 | UCUAUAGA<br>AGAUUUCU | -6.89  | (10) |
| 55 | R63 | UAGAUCUA<br>AUCUAGAU | -7.06  | (10) |
| 56 | R64 | GUCGAC<br>CAGCUG     | -7.08  | (10) |
| 57 | R65 | ACUAUAGU<br>UGAUUUCA | -7.09  | (10) |
| 58 | R67 | UGAUCA<br>ACUAGU     | -5.00  | (10) |
| 59 | R68 | UCAUGA<br>AGUACU     | -3.82  | (10) |

|    |     |                      |        |      |
|----|-----|----------------------|--------|------|
| 60 | R70 | UGC<br>GCA<br>ACGCGU | -8.17  | (11) |
| 61 | R71 | AGCGCU<br>UCGCGA     | -8.01  | (11) |
| 62 | R72 | GGCGCC<br>CCGCGG     | -11.31 | (11) |
| 63 | R73 | UGC<br>GCA<br>ACGCGU | -8.12  | (12) |
| 64 | R74 | GAUGCAUU<br>UUACGUAG | -6.82  | (13) |
| 65 | R75 | UAUGCAUG<br>GUACGUAU | -6.44  | (13) |
| 66 | R76 | GCGGCG<br>CGCCGC     | -10.43 | (14) |
| 67 | R78 | AUGGUCAU<br>UACUGGUA | -5.42  | (15) |
| 68 | R79 | CCUGUAGG<br>GGAUGUCC | -6.81  | (15) |
| 69 | R80 | CGGGUCCG<br>GCCUGGGC | -11.18 | (15) |
| 70 | R81 | CGUUGACG<br>GCAGUUGC | -6.94  | (15) |
| 71 | R82 | CUGGUCAG<br>GACUGGUC | -7.11  | (15) |
| 72 | R83 | GGAGUUCC<br>CCUUGAGG | -6.45  | (15) |
| 73 | R84 | GGAUGUCC<br>CCUGUAGG | -8.36  | (15) |
| 74 | R85 | GGCGUGCC<br>CCGUGCGG | -9.23  | (15) |
| 75 | R86 | GUCGUGAC<br>CAGUGCUG | -6.05  | (15) |
| 76 | R87 | GAGUUGAG<br>CUCGGCUC | -8.21  | (15) |
| 77 | R88 | AGGCUU<br>UUCGGA     | -4.04  | (15) |
| 78 | R89 | AGUCGAUU<br>UUAGCUGA | -5.97  | (15) |
| 79 | R90 | CGGAUUCG<br>GCUUAGGC | -6.54  | (15) |
| 80 | R91 | CCUAGG<br>GGAUCC     | -7.86  | (15) |

|     |      |                      |        |      |
|-----|------|----------------------|--------|------|
| 81  | R93  | GGAUCC<br>CCUAGG     | -7.46  | (15) |
| 82  | R94  | CACAG<br>GUGUC       | -4.41  | (16) |
| 83  | R95  | UGACCUCA<br>ACUGGAGU | -12.34 | (17) |
| 84  | R96  | GAGCUC<br>CUCGAG     | -7.73  | (18) |
| 85  | R97  | GCGUGC<br>CGUGCG     | -5.11  | (18) |
| 86  | R98  | GAGGUCUC<br>CUCUGGAG | -8.77  | (19) |
| 87  | R99  | GAGCUC<br>CUCGAG     | -7.93  | (19) |
| 88  | R100 | GGUACC<br>CCAUGG     | -7.32  | (19) |
| 89  | R101 | GAGUGCUC<br>CUCGUGAG | -9.17  | (20) |
| 90  | R102 | GGUUGACC<br>CCAGUUGG | -8.30  | (20) |
| 91  | R103 | GGCUGGCC<br>CCGGUCGG | -13.26 | (20) |
| 92  | R106 | CCAUGUGG<br>GGUGUACC | -7.82  | (21) |
| 93  | R107 | CCAGUUGG<br>GGUUGACC | -5.71  | (21) |
| 94  | R108 | CCAUGG<br>GGUACC     | -7.39  | (21) |
| 95  | R109 | GAGGAG<br>CUCCUC     | -8.50  | (22) |
| 96  | R110 | GAGUGGAG<br>CUCGUCUC | -9.69  | (22) |
| 97  | R112 | GAGGUGAG<br>CUCUGCUC | -7.62  | (22) |
| 98  | R113 | CGCG<br>GCGC         | -3.66  | (1)  |
| 99  | R114 | ACGCA<br>UGCGU       | -4.96  | (1)  |
| 100 | R115 | AGCGA<br>UCGCU       | -5.06  | (1)  |
| 101 | R116 | GCACG<br>CGUGC       | -6.17  | (1)  |

|     |      |                    |        |     |
|-----|------|--------------------|--------|-----|
| 102 | R117 | GCUCG<br>CGAGC     | -6.13  | (1) |
| 103 | R118 | CACGUG<br>GUGCAC   | -6.58  | (1) |
| 104 | R119 | CCGCGG<br>GGCGCC   | -9.83  | (1) |
| 105 | R120 | GCAACG<br>CGUUGC   | -6.99  | (1) |
| 106 | R121 | GCAUCG<br>CGUAGC   | -7.26  | (1) |
| 107 | R122 | GCCGCG<br>CGGCGC   | -10.87 | (1) |
| 108 | R123 | GCGCCG<br>CGCGGC   | -10.92 | (1) |
| 109 | R124 | GCGCGG<br>CGCGCC   | -11.39 | (1) |
| 110 | R125 | GCGUCG<br>CGCAGC   | -8.77  | (1) |
| 111 | R126 | GCUACG<br>CGAUGC   | -7.56  | (1) |
| 112 | R127 | GGCGCG<br>CCGCGC   | -10.77 | (1) |
| 113 | R128 | GUGGUG<br>CACCAC   | -7.68  | (1) |
| 114 | R129 | GUGUCG<br>CACAGC   | -7.18  | (1) |
| 115 | R130 | UCGCGA<br>AGCGCU   | -6.85  | (1) |
| 116 | R131 | UCUAGA<br>AGAUCU   | -4.96  | (1) |
| 117 | R132 | AAGGAGG<br>UUCCUCC | -9.53  | (1) |
| 118 | R133 | ACUGUCA<br>UGACAGU | -7.92  | (1) |
| 119 | R134 | AGUCUGA<br>UCAGACU | -7.50  | (1) |
| 120 | R135 | GACUCAG<br>CUGAGUC | -9.06  | (1) |
| 121 | R136 | GAGUGAG<br>CUCACUC | -9.70  | (1) |
| 122 | R137 | GUCACUG<br>CAGUGAC | -8.62  | (1) |

|     |      |                          |        |      |
|-----|------|--------------------------|--------|------|
| 123 | R138 | ACCUUUGC<br>UGGAAACG     | -10.64 | (1)  |
| 124 | R139 | CGACGCAG<br>GCUGCGUC     | -12.32 | (1)  |
| 125 | R140 | CUCGCACA<br>GAGCGUGU     | -12.10 | (1)  |
| 126 | R141 | GGCUUCAA<br>CCGAAGUU     | -10.20 | (1)  |
| 127 | R142 | UCCUUGCA<br>AGGAACGU     | -11.09 | (1)  |
| 128 | R143 | UCCGGAA<br>AAGCCUU       | -10.80 | (1)  |
| 129 | R144 | UUGCGCAA<br>AACGCGUU     | -10.19 | (1)  |
| 130 | R145 | UUGCCAA<br>AACCGUU       | -11.02 | (1)  |
| 131 | R146 | UUGUACAA<br>ACAUGUU      | -6.71  | (1)  |
| 132 | R147 | AAGGUUGGAA<br>UCCAACCUU  | -12.69 | (1)  |
| 133 | R148 | CAUGCG<br>GUACGC         | -7.01  | (1)  |
| 134 | R150 | GCUGAG<br>CGACUC         | -7.71  | (1)  |
| 135 | R151 | GUGCAG<br>CACGUC         | -7.68  | (1)  |
| 136 | R156 | UCCGCGCA<br>AGGCGCGU     | -14.59 | (1)  |
| 137 | R157 | GCGGCG<br>CGCCGC         | -10.91 | (23) |
| 138 | R158 | GCGGCG<br>CGCGCG         | -10.82 | (23) |
| 139 | R159 | AAGGCCGGAA<br>UCCGGCCUU  | -18.15 | (24) |
| 140 | R160 | CCUCUGGUGA<br>GGAGACCGCU | -15.31 | (24) |
| 141 | R161 | AGGCCGGA<br>UCCGGCCU     | -15.26 | (24) |
| 142 | R162 | GAGCCGAC<br>CUCGGCUG     | -13.76 | (24) |
| 143 | R163 | UCACCUGA<br>AGUGGACU     | -10.84 | (24) |

|     |      |                      |        |             |
|-----|------|----------------------|--------|-------------|
| 144 | R166 | CUGGUC<br>GACCAG     | -8.05  | (25)        |
| 145 | R168 | GAGUUGAC<br>CUCAACUG | -10.60 | (26)        |
| 146 | R169 | GAGUGAG<br>CUCGCUC   | -7.81  | (23)        |
| 147 | R170 | AUCUAGGU<br>UGGAUCUA | -5.90  | Unpublished |
| 148 | R171 | GUCUAGAU<br>UAGAUCUG | -7.66  | Unpublished |



Supplementary Table 2: Dangling End Duplex Experiment List

Note: The top strand is shown 5' to 3'. The bottom strand is shown 3' to 5'. Unpaired nucleotides are in lower case.

| Index | ID# | Duplex             | Folding Free Energy Change (kcal/mol) | Reference |
|-------|-----|--------------------|---------------------------------------|-----------|
| 149   | D1  | UGCGCAa<br>aACGCGU | -9.60                                 | (12)      |
| 150   | D2  | UGCGCAc<br>cACGCGU | -9.11                                 | (12)      |
| 151   | D3  | UGCGCAg<br>gACGCGU | -9.79                                 | (12)      |
| 152   | D4  | UGCGCAu<br>uACGCGU | -9.27                                 | (12)      |
| 153   | D5  | AUGCAUa<br>aUACGUA | -6.06                                 | (12)      |
| 154   | D6  | AUGCAUc<br>cUACGUA | -4.98                                 | (12)      |
| 155   | D7  | AUGCAUg<br>gUACGUA | -6.06                                 | (12)      |
| 156   | D8  | AUGCAUu<br>uUACGUA | -4.91                                 | (12)      |
| 157   | D9  | CCGGa<br>aGGCC     | -6.85                                 | (3)       |
| 158   | D10 | CCGGa<br>aGGCC     | -6.84                                 | (3)       |
| 159   | D11 | CCGGc<br>cGGCC     | -5.25                                 | (4)       |
| 160   | D12 | CCGGg<br>gGGCC     | -7.05                                 | (4)       |
| 161   | D13 | CCGGu<br>uGGCC     | -5.81                                 | (4)       |
| 162   | D14 | CCGGu<br>uGGCC     | -5.76                                 | (3)       |
| 163   | D15 | GCGCa<br>aCGCG     | -7.92                                 | (11)      |
| 164   | D16 | GGCCa<br>aCCGG     | -9.01                                 | (4)       |
| 165   | D17 | GCGCc<br>cCGCG     | -6.16                                 | (11)      |
| 166   | D18 | GGCCc<br>cCCGG     | -6.96                                 | (4)       |

|     |     |                    |       |             |
|-----|-----|--------------------|-------|-------------|
| 167 | D19 | GCGCg<br>gCGCG     | -7.70 | (11)        |
| 168 | D20 | GGCCg<br>gCCGG     | -8.88 | (4)         |
| 169 | D21 | GGCCu<br>uCCGG     | -8.16 | (5)         |
| 170 | D22 | GCGCu<br>uCGCG     | -6.93 | (11)        |
| 171 | D23 | GGCCu<br>uCCGG     | -7.98 | (4)         |
| 172 | D24 | aUGCGCA<br>ACGCGUa | -8.72 | (12)        |
| 173 | D25 | cUCAUGA<br>AGUACUc | -4.09 | Unpublished |
| 174 | D26 | aAUGCAU<br>UACGUAA | -5.38 | (12)        |
| 175 | D27 | cAUGCAU<br>UACGUAc | -5.23 | (12)        |
| 176 | D28 | gAUGCAU<br>UACGUAg | -5.44 | (12)        |
| 177 | D29 | uAUGCAU<br>UACGUAu | -5.11 | (12)        |
| 178 | D30 | aCCGG<br>GGCCa     | -5.60 | (3)         |
| 179 | D31 | cCCGG<br>GGCCc     | -5.27 | Unpublished |
| 180 | D32 | gCCGG<br>GGCCg     | -4.90 | (5)         |
| 181 | D33 | uCCGG<br>GGCCu     | -4.84 | (5)         |
| 182 | D34 | aGGCC<br>CCGGa     | -5.81 | (5)         |
| 183 | D35 | cGGCC<br>CCGGc     | -5.79 | (5)         |
| 184 | D36 | cGCGC<br>CGCGc     | -5.27 | (11)        |
| 185 | D37 | gGCGC<br>CGCGg     | -4.55 | (11)        |
| 186 | D38 | uGGCC<br>CCGGu     | -5.17 | (5)         |
| 187 | D39 | uGCGC<br>CGCGu     | -5.08 | (11)        |

|     |     |                    |        |      |
|-----|-----|--------------------|--------|------|
| 188 | D40 | GGCCc<br>cCCGG     | -7.22  | (4)  |
| 189 | D41 | GCCGGUa<br>aUGGCCG | -11.37 | (8)  |
| 190 | D42 | GCGGCGa<br>aCGCCGC | -14.63 | (14) |
| 191 | D43 | GACCGCa<br>aCUGGCG | -12.17 | (14) |
| 192 | D44 | AGCGCGp<br>pGCGCGA | -8.73  | (27) |
| 193 | D45 | GCCGGAg<br>gAGGCCG | -8.44  | (27) |

Supplementary Table 3: Terminal Mismatch Duplex Experiment List

Note: The top strand is shown 5' to 3'. The bottom strand is shown 3' to 5'. Unpaired nucleotides are in lower case.

| Index | ID# | Duplex               | Folding Free Energy Change (kcal/mol) | Reference |
|-------|-----|----------------------|---------------------------------------|-----------|
| 194   | T1  | aUGCGCAa<br>aACGCGUa | -9.68                                 | (13)      |
| 195   | T2  | aUGCGCAc<br>cACGCGUa | -9.42                                 | (13)      |
| 196   | T3  | aUGCGCAg<br>gACGCGUa | -9.77                                 | (13)      |
| 197   | T4  | aGCGCa<br>aCGCGa     | -7.64                                 | (28)      |
| 198   | T5  | cGGCCa<br>aCCGGc     | -8.30                                 | (28)      |
| 199   | T6  | gGCGCa<br>aCGCGg     | -7.52                                 | (28)      |
| 200   | T7  | uGGCCc<br>cCCGGu     | -6.90                                 | (28)      |
| 201   | T8  | gGCGCg<br>gCGCGg     | -7.71                                 | (28)      |
| 202   | T9  | cGGCCu<br>uCCGGc     | -8.09                                 | (28)      |
| 203   | T10 | uGCGCu<br>uCGCGu     | -7.01                                 | (8)       |
| 204   | T11 | aCCGGa<br>aGGCCa     | -6.73                                 | (29)      |
| 205   | T12 | gCCGGa<br>aGGCCg     | -7.03                                 | (8)       |
| 206   | T13 | aCCGGc<br>cGGCCa     | -6.72                                 | (29)      |
| 207   | T14 | aCCGGg<br>gGGCCa     | -7.71                                 | (29)      |
| 208   | T15 | gCCGGg<br>gGGCCg     | -7.48                                 | (8)       |
| 209   | T16 | aUCCGGGa<br>aGGGCCUa | -7.94                                 | (30)      |
| 210   | T17 | aUGGCCGg<br>gGCCGGUa | -9.72                                 | (30)      |
| 211   | T18 | uUGGCCGu<br>uGCCGGUu | -9.70                                 | (31)      |

|     |     |                      |        |      |
|-----|-----|----------------------|--------|------|
| 212 | T19 | aAUGCAUa<br>aUACGUAA | -6.61  | (13) |
| 213 | T20 | cAUGCAUa<br>aUACGUAC | -6.25  | (13) |
| 214 | T21 | gAUGCAUa<br>aUACGUAg | -6.93  | (13) |
| 215 | T22 | aAUGCAUc<br>cUACGUAA | -6.17  | (13) |
| 216 | T23 | cAUGCAUc<br>cUACGUAC | -5.90  | (13) |
| 217 | T24 | uAUGCAUc<br>cUACGUAu | -5.66  | (13) |
| 218 | T25 | aAUGCAUg<br>gUACGUAA | -6.96  | (13) |
| 219 | T26 | gAUGCAUg<br>gUACGUAg | -7.02  | (13) |
| 220 | T27 | cAUGCAUu<br>uUACGUAC | -5.91  | (13) |
| 221 | T28 | uAUGCAUu<br>uUACGUAu | -5.75  | (13) |
| 222 | T29 | aGCGUa<br>aUGCGa     | -3.97  | (30) |
| 223 | T30 | aGGCGCUg<br>gUCGCGGa | -9.38  | (30) |
| 224 | T31 | gGCCGGUg<br>gUGGCCGg | -10.79 | (30) |
| 225 | T32 | uGCCGGUu<br>uUGGCCGu | -9.97  | (31) |
| 226 | T33 | aGCGCg<br>gCGCGa     | -7.47  | (27) |

Supplementary Table 4: Hairpin Loop Experiment List

Note: The sequence is shown 5' to 3'. Unpaired nucleotides are in lower case.

| Index | ID# | Duplex             | Folding Free Energy Change (kcal/mol) | Reference |
|-------|-----|--------------------|---------------------------------------|-----------|
| 227   | H1  | GGAuaaUCC          | 0.64                                  | (32)      |
| 228   | H2  | GGAGaaaUCC         | -0.93                                 | (30)      |
| 229   | H3  | GGCauaGCC          | -0.96                                 | (32)      |
| 230   | H4  | GGGaaaUCC          | 0.33                                  | (30)      |
| 231   | H5  | GGGauaCCC          | -0.21                                 | (32)      |
| 232   | H6  | GGGAUACaaaGUAUCCA  | -6.30                                 | (33)      |
| 233   | H7  | GGGAUACcccGUAUCCA  | -4.64                                 | (33)      |
| 234   | H8  | GGGAUACuuuGUAUCCA  | -7.03                                 | (33)      |
| 235   | H9  | GGUauaACC          | 0.58                                  | (32)      |
| 236   | H10 | GGUauaGCC          | 0.87                                  | (30)      |
| 237   | H11 | GCGauuaUGC         | -0.32                                 | (30)      |
| 238   | H12 | GCGGauuaUCGC       | -1.41                                 | (30)      |
| 239   | H13 | GGAuuuaUCC         | -0.06                                 | (32)      |
| 240   | H14 | GGCauuaGCC         | -2.52                                 | (32)      |
| 241   | H15 | GGGaccaUCC         | -1.81                                 | (30)      |
| 242   | H16 | GGGauuaCCC         | -1.28                                 | (32)      |
| 243   | H17 | GGGAUACaaaaGUAUCCA | -7.60                                 | (33)      |
| 244   | H18 | GGGAUACccccGUAUCCA | -4.30                                 | (33)      |
| 245   | H19 | GGGAUACuuuuGUAUCCA | -8.16                                 | (33)      |
| 246   | H20 | GGUauuaACC         | -1.79                                 | (32)      |
| 247   | H21 | GGUauuaGCC         | 0.17                                  | (30)      |
| 248   | H22 | GGUgcaaGCC         | -1.44                                 | (30)      |
| 249   | H23 | GGCgagaGCC         | -3.31                                 | (31)      |
| 250   | H24 | GGCgcgaGCC         | -3.50                                 | (31)      |
| 251   | H25 | GGCgggaGCC         | -3.23                                 | (31)      |

|     |     |                     |       |      |
|-----|-----|---------------------|-------|------|
| 252 | H26 | GGCgugaGCC          | -3.16 | (31) |
| 253 | H27 | GGCgaaaGCC          | -3.19 | (31) |
| 254 | H28 | GGCgcaaGCC          | -3.35 | (31) |
| 255 | H29 | GGCggaaGCC          | -3.23 | (31) |
| 256 | H30 | GGCguaaGCC          | -3.53 | (31) |
| 257 | H31 | GGACuuuuGUCC        | -4.20 | (34) |
| 258 | H32 | GGAGuucgUCC         | -4.05 | (34) |
| 259 | H33 | GGACgcuuGUCC        | -4.43 | (34) |
| 260 | H34 | GGGgaagaUGC         | -0.28 | (30) |
| 261 | H35 | GGAuuuuUCC          | 0.42  | (32) |
| 262 | H36 | GGCauauaGCC         | -2.38 | (32) |
| 263 | H37 | GGCauuuuGCC         | -2.66 | (32) |
| 264 | H38 | GGGauauaCCC         | -1.38 | (32) |
| 265 | H39 | GGGauuuuCCC         | -1.70 | (32) |
| 266 | H40 | GGGauuuuUCC         | -0.70 | (30) |
| 267 | H41 | GGGAUACaaaaGUAUCCA  | -7.72 | (33) |
| 268 | H42 | GGGAUACccccGUAUCCA  | -4.10 | (33) |
| 269 | H43 | GGGAUACuuuuuGUAUCCA | -8.13 | (33) |
| 270 | H44 | GGUauuuuACC         | -0.25 | (32) |
| 271 | H45 | GGUauuuuGCC         | -0.57 | (30) |
| 272 | H46 | ACCgacacaGGU        | -1.60 | (28) |
| 273 | H47 | AGGAauaauaUCCU      | -2.38 | (35) |
| 274 | H48 | AGGUauaauaGCCU      | -2.21 | (35) |
| 275 | H49 | CGGuuaauuCCG        | -1.95 | (28) |
| 276 | H50 | CUCUacaccaAGAG      | -1.78 | (28) |
| 277 | H51 | GCGgugaaaUGC        | -0.69 | (30) |
| 278 | H52 | GCGuuaauuUGC        | 0.35  | (30) |
| 279 | H53 | GGAuaaauaUCC        | -0.73 | (35) |
| 280 | H54 | GGAguaaauaUCC       | -1.72 | (28) |

|     |     |                 |       |      |
|-----|-----|-----------------|-------|------|
| 281 | H55 | GGCauaauaGCC    | -2.76 | (35) |
| 282 | H56 | GGCauaaucGCC    | -2.56 | (28) |
| 283 | H57 | GGCauaaugGCC    | -3.11 | (28) |
| 284 | H58 | GGCcuauaGCC     | -2.15 | (28) |
| 285 | H59 | GGCcuaaucGCC    | -2.38 | (28) |
| 286 | H60 | GGCcuauuuGCC    | -1.82 | (28) |
| 287 | H61 | GGCguaauaGCC    | -3.47 | (35) |
| 288 | H62 | GGCguaaugGCC    | -3.85 | (28) |
| 289 | H63 | GGCuuaaucGCC    | -2.89 | (28) |
| 290 | H64 | GGCuuaauuGCC    | -6.23 | (28) |
| 291 | H65 | GGGauaauaUCC    | -1.42 | (35) |
| 292 | H66 | GGUauaauaACC    | -0.34 | (35) |
| 293 | H67 | GGUauaauaGCC    | -0.47 | (35) |
| 294 | H68 | GGUguaauaACC    | -1.54 | (28) |
| 295 | H69 | GGUguaauaGCC    | -1.85 | (28) |
| 296 | H70 | GGUguaaugACC    | -1.04 | (28) |
| 297 | H71 | GGUguaaugGCC    | -1.29 | (30) |
| 298 | H72 | GUGguaauaCAC    | -1.08 | (28) |
| 299 | H73 | GUGguaauaUAC    | 0.94  | (28) |
| 300 | H74 | GGAUuaauuUCC    | -1.29 | (31) |
| 301 | H75 | GGUuuauuACC     | -0.83 | (31) |
| 302 | H76 | GGUuuauuGCC     | -0.53 | (31) |
| 303 | H77 | GCGguaaugCGC    | -2.54 | (31) |
| 304 | H78 | GGAguaaugUCC    | -1.16 | (31) |
| 305 | H80 | GCGguaaugUGC    | -0.80 | (31) |
| 306 | H81 | GCGAuaaaauaUCGC | -2.41 | (32) |
| 307 | H82 | GGCauaaaauaGCC  | -2.11 | (32) |
| 308 | H83 | GGGacggacaUCC   | -1.03 | (30) |
| 309 | H84 | GGGauaaaauaCCC  | -2.12 | (32) |



|     |      |                        |       |      |
|-----|------|------------------------|-------|------|
| 310 | H85  | GGGauaaaaUCC           | -0.22 | (30) |
| 311 | H86  | GGGAUACaaaaaaGUAUCCA   | -7.19 | (33) |
| 312 | H87  | GGGAUACccccccGUAUCCA   | -2.91 | (33) |
| 313 | H88  | GGGAUACuuuuuuGUAUCCA   | -7.38 | (33) |
| 314 | H89  | GGUauaaaaACC           | -0.41 | (32) |
| 315 | H90  | GGUauaaaaGCC           | 0.56  | (30) |
| 316 | H91  | GGUguaaaaGCC           | -0.66 | (30) |
| 317 | H92  | GCGauuucuaUGC          | -0.65 | (30) |
| 318 | H93  | GCUGaauggaaGGC         | -1.28 | (30) |
| 319 | H94  | GGAuaaaaUCC            | -2.19 | (32) |
| 320 | H95  | GGCauaaaaGCC           | -2.16 | (32) |
| 321 | H96  | GGGauaaaaCCC           | -2.35 | (32) |
| 322 | H97  | GGGauaaaaUCC           | -1.65 | (30) |
| 323 | H98  | GGUauuucuaGCC          | -0.08 | (30) |
| 324 | H99  | GGUauaaaaACC           | 0.51  | (32) |
| 325 | H100 | GGUauaaaaGCC           | 0.03  | (30) |
| 326 | H101 | GCGAuaaaaUcGC          | -2.23 | (32) |
| 327 | H102 | GCGUauaaaaACGC         | -1.08 | (32) |
| 328 | H103 | GGAuaaaaUCC            | 0.25  | (32) |
| 329 | H104 | GGCauaaaaGCC           | -2.14 | (32) |
| 330 | H105 | GGGauaaaaCCC           | -2.09 | (32) |
| 331 | H106 | GGGAUACaaaaaaaaGUAUCCA | -5.55 | (33) |
| 332 | H107 | GGGAUACcccccccGUAUCCA  | -2.10 | (33) |
| 333 | H108 | GGGAUACuuuuuuuuGUAUCCA | -8.05 | (33) |
| 334 | H126 | GGACaacGUCC            | -1.32 | (36) |
| 335 | H127 | GGAGuuaCUCC            | -0.92 | (36) |
| 336 | H132 | GGCuacgGCC             | -3.22 | (31) |
| 337 | H133 | GGCuccgGCC             | -3.95 | (31) |
| 338 | H134 | GGCuucgGCC             | -4.09 | (31) |

|     |      |                  |       |      |
|-----|------|------------------|-------|------|
| 339 | H135 | GAAGAcaguguUCUUC | -5.52 | (37) |
| 340 | H136 | GAAGAcagugcUCUUC | -5.44 | (37) |
| 341 | H137 | GAAGAcaguacUCUUC | -4.44 | (37) |
| 342 | H138 | GGACagugcGUCC    | -1.02 | (31) |
| 343 | H139 | GGACagugaGUCC    | -1.59 | (31) |
| 344 | H141 | GGACuuugGUCC     | -3.79 | (38) |
| 345 | H148 | GGACuucgGUCC     | -6.31 | (34) |
| 346 | H149 | GGACuuugGUCC     | -4.30 | (34) |
| 347 | H150 | GGACuacgGUCC     | -5.68 | (34) |
| 348 | H152 | GGACcaagGUCC     | -4.02 | (39) |
| 349 | H153 | GGACccagGUCC     | -3.83 | (39) |
| 350 | H154 | GGACcgagGUCC     | -3.67 | (39) |
| 351 | H155 | GGACcuagGUCC     | -3.64 | (39) |
| 352 | H156 | GGACcacgGUCC     | -3.56 | (39) |
| 353 | H158 | GGACcgcgGUCC     | -3.67 | (39) |
| 354 | H159 | GGACcucgGUCC     | -4.77 | (39) |
| 355 | H160 | GGACuaagGUCC     | -3.61 | (39) |
| 356 | H161 | GGACucagGUCC     | -3.61 | (39) |
| 357 | H163 | GGACuuagGUCC     | -3.76 | (39) |
| 358 | H164 | GGACuacgGUCC     | -4.88 | (39) |
| 359 | H165 | GGACuccgGUCC     | -4.45 | (39) |
| 360 | H166 | GGACugcgGUCC     | -4.42 | (39) |
| 361 | H167 | GGACuucgGUCC     | -4.78 | (39) |
| 362 | H170 | GGACaacgGUCC     | -1.77 | (39) |

Supplementary Table 5: Internal Loop Duplex Experiment List

Note: The top strand is shown 5' to 3'. The bottom strand is shown 3' to 5'. Unpaired nucleotides are in lower case. The underscore character (\_) does not represent a nucleotide. It is used to maintain alignment between the top and bottom strands.

| Index | ID# | Duplex             | Folding Free Energy Change (kcal/mol) | Reference |
|-------|-----|--------------------|---------------------------------------|-----------|
| 363   | I1  | GAGcGAG<br>CUCaCUC | -5.63                                 | (23)      |
| 364   | I2  | GAGaGAG<br>CUCgCUC | -5.32                                 | (23)      |
| 365   | I3  | GAGcGAG<br>CUCuCUC | -5.22                                 | (23)      |
| 366   | I4  | GAGuGAG<br>CUCuCUC | -5.24                                 | (23)      |
| 367   | I5  | GAGaGAG<br>CUCcCUC | -4.95                                 | (23)      |
| 368   | I6  | GAGaGAG<br>CUCaCUC | -4.85                                 | (23)      |
| 369   | I7  | GAGcGAG<br>CUCcCUC | -4.75                                 | (23)      |
| 370   | I8  | GAGuGAG<br>CUCcCUC | -4.75                                 | (23)      |
| 371   | I9  | GCGuCCG<br>CGCuGGC | -8.23                                 | (23)      |
| 372   | I10 | GCGuCGC<br>CGCuGCG | -7.90                                 | (23)      |
| 373   | I11 | GCGuGCG<br>CGCuGCG | -7.79                                 | (23)      |
| 374   | I12 | GCCuGCG<br>CGGuGCG | -8.15                                 | (23)      |
| 375   | I13 | CGCuGCG<br>GCGuGCG | -6.31                                 | (23)      |
| 376   | I14 | GCGuJCG<br>CGCuAGC | -5.99                                 | (23)      |
| 377   | I15 | GUGuJCG<br>CACuAGC | -3.80                                 | (23)      |
| 378   | I16 | GCAuJCG<br>CGUuAGC | -4.98                                 | (23)      |
| 379   | I17 | GCAuACG<br>CGUuJGC | -4.55                                 | (23)      |

|     |     |                        |       |      |
|-----|-----|------------------------|-------|------|
| 380 | I18 | GCUuACG<br>CGAuUGC     | -4.47 | (23) |
| 381 | I19 | CGCaGCG<br>GCGaCGC     | -6.08 | (17) |
| 382 | I20 | GCGaCCG<br>CGCaGGC     | -6.67 | (23) |
| 383 | I21 | GGCaGCC<br>CCGaCGG     | -7.83 | (23) |
| 384 | I22 | GgCUGAG<br>CgGACUC     | -6.87 | (23) |
| 385 | I23 | CGgCAUG<br>GCgGUAC     | -6.07 | (23) |
| 386 | I24 | GUGgCAG<br>CACgGUC     | -6.66 | (23) |
| 387 | I25 | GCGgCGC<br>CGCgGCG     | -9.28 | (23) |
| 388 | I26 | CGCgGCG<br>GCGgCGC     | -8.14 | (23) |
| 389 | I27 | UGACaCUCA<br>ACUGaGAGU | -7.94 | (17) |
| 390 | I28 | GAGaGGAG<br>CUCgUCUC   | -5.83 | (22) |
| 391 | I29 | GAGuGGAG<br>CUCuUCUC   | -6.26 | (22) |
| 392 | I30 | GAGaGGAG<br>CUCaUCUC   | -5.27 | (22) |
| 393 | I31 | GAGgUGAG<br>CUCaGCUC   | -4.97 | (22) |
| 394 | I32 | GAGaUGAG<br>CUCgGCUC   | -4.67 | (22) |
| 395 | I33 | GAGuUGAG<br>CUCuGCUC   | -4.69 | (22) |
| 396 | I34 | GAGaUGAG<br>CUCaGCUC   | -4.36 | (22) |
| 397 | I35 | GAGUaGAG<br>CUCGgCUC   | -6.11 | (22) |
| 398 | I36 | GAGUgGAG<br>CUCGaCUC   | -6.09 | (22) |
| 399 | I37 | GAGUuGAG<br>CUCGuCUC   | -6.24 | (22) |
| 400 | I38 | GAGUcGAG<br>CUCGcCUC   | -5.56 | (22) |

|     |     |                          |       |      |
|-----|-----|--------------------------|-------|------|
| 401 | I39 | GAGUcGAG<br>CUCGaCUC     | -6.00 | (22) |
| 402 | I40 | GAGUaGAG<br>CUCGaCUC     | -5.15 | (22) |
| 403 | I41 | GAGGaGAG<br>CUCUgCUC     | -6.56 | (22) |
| 404 | I42 | GAGGuGAG<br>CUCUuCUC     | -5.21 | (22) |
| 405 | I43 | GAGGcGAG<br>CUCUuCUC     | -5.39 | (22) |
| 406 | I44 | GAGGcGAG<br>CUCUaCUC     | -5.83 | (22) |
| 407 | I45 | GAGGaGAG<br>CUCUaCUC     | -5.74 | (22) |
| 408 | I46 | UGACa_CUCA<br>ACUGaaGAGU | -6.80 | (40) |
| 409 | I47 | UGACa_CUCA<br>ACUGaaGAGU | -6.43 | (17) |
| 410 | I48 | UGAGa_GUCA<br>ACUCaaCAGU | -6.60 | (17) |
| 411 | I49 | UGACa_CUCA<br>ACUGagGAGU | -8.32 | (40) |
| 412 | I50 | UCAGa_GUGA<br>AGUCagCACU | -6.44 | (24) |
| 413 | I51 | UGACa_CUCA<br>ACUGccGAGU | -7.42 | (40) |
| 414 | I52 | UGACa_CUCA<br>ACUGgaGAGU | -8.01 | (40) |
| 415 | I53 | UGAGa_GUCA<br>ACUCgaCAGU | -6.98 | (40) |
| 416 | I54 | UGACc_CUCA<br>ACUGaaGAGU | -6.80 | (40) |
| 417 | I55 | UGACc_CUCA<br>ACUGauGAGU | -6.60 | (40) |
| 418 | I56 | UGACc_CUCA<br>ACUGccGAGU | -6.62 | (40) |
| 419 | I57 | UGACc_CUCA<br>ACUGcuGAGU | -7.16 | (40) |
| 420 | I58 | UGACg_CUCA<br>ACUGaaGAGU | -7.35 | (40) |
| 421 | I59 | UGACg_CUCA<br>ACUGagGAGU | -7.92 | (40) |

|     |     |                          |        |             |
|-----|-----|--------------------------|--------|-------------|
| 422 | I60 | UGACg_CUCA<br>ACUGgaGAGU | -8.32  | (40)        |
| 423 | I61 | UGACu_CUCA<br>ACUGccGAGU | -6.85  | (40)        |
| 424 | I62 | UCACu_CUGA<br>AGUGcuGACU | -5.91  | (24)        |
| 425 | I63 | UGACu_CUCA<br>ACUGucGAGU | -7.54  | (40)        |
| 426 | I64 | UGACu_CUCA<br>ACUGuuGAGU | -7.90  | (40)        |
| 427 | I65 | AGGCu_CGGA<br>UCCGuuGCCU | -10.43 | (24)        |
| 428 | I66 | GCGagCGC<br>CGCgaGCG     | -8.46  | (18)        |
| 429 | I67 | GCGuuCGC<br>CGCuuGCG     | -7.66  | (19)        |
| 430 | I68 | CGGcaCCG<br>GCCacGGC     | -5.49  | (19)        |
| 431 | I69 | CUGcuCAG<br>GACucGUC     | -2.32  | (19)        |
| 432 | I70 | CGGcuCCG<br>GCCucGGC     | -5.57  | (19)        |
| 433 | I71 | GCGacCGC<br>CGCcaGCG     | -6.23  | (19)        |
| 434 | I72 | GCGaaCGC<br>CGCaaGCG     | -5.66  | (19)        |
| 435 | I73 | GGCagGCC<br>CCGgaCGG     | -9.44  | Unpublished |
| 436 | I74 | CGCagGCG<br>GCGgaCGC     | -7.76  | (41)        |
| 437 | I75 | CGCuuGCG<br>GCGuuGCG     | -7.18  | (42)        |
| 438 | I76 | UGCggGCA<br>ACGggCGU     | -5.02  | (42)        |
| 439 | I77 | CGCcaGCG<br>GCGacCGC     | -5.69  | (42)        |
| 440 | I78 | CGCcuGCG<br>GCGucCGC     | -5.45  | (42)        |
| 441 | I79 | CGCucGCG<br>GCGcuCGC     | -5.38  | (42)        |
| 442 | I80 | CGCccGCG<br>GCGccCGC     | -5.13  | (42)        |

|     |      |                          |       |      |
|-----|------|--------------------------|-------|------|
| 443 | I81  | GGCacGCC<br>CCGcaCGG     | -6.97 | (42) |
| 444 | I82  | CGCaaGCG<br>GCGaaCGC     | -5.44 | (17) |
| 445 | I83  | GCUgaAGC<br>CGAagUCG     | -5.88 | (18) |
| 446 | I84  | GCUuuAGC<br>CGAuuUCG     | -5.50 | (19) |
| 447 | I85  | GGUcaACC<br>CCAacUGG     | -4.14 | (19) |
| 448 | I86  | GGUcuACC<br>CCAucUGG     | -3.86 | (19) |
| 449 | I87  | GGUucACC<br>CCAcuUGG     | -3.21 | (19) |
| 450 | I88  | GCUaaAGC<br>CGAaaUCG     | -3.82 | (19) |
| 451 | I89  | GGAgaUCC<br>CCUagAGG     | -6.41 | (18) |
| 452 | I90  | GCAgaUGC<br>CGUagACG     | -5.61 | (18) |
| 453 | I91  | GCAuuUGC<br>CGUuuACG     | -5.61 | (19) |
| 454 | I92  | GGAcaUCC<br>CCUacAGG     | -4.01 | (19) |
| 455 | I93  | GGAacUCC<br>CCUcaAGG     | -3.89 | (19) |
| 456 | I94  | GCAaaUGC<br>CGUaaACG     | -3.52 | (19) |
| 457 | I95  | GGCgaGCC<br>CCGagCGG     | -9.69 | (41) |
| 458 | I96  | GAGgaGAG<br>CUCagCUC     | -6.91 | (22) |
| 459 | I97  | GAGaaGAG<br>CUCggCUC     | -5.74 | (22) |
| 460 | I98  | GAGuaGAG<br>CUCugCUC     | -4.26 | (22) |
| 461 | I99  | GAGaaGAG<br>CUCcgCUC     | -4.61 | (22) |
| 462 | I100 | UGAGaaGUCA<br>ACUCaaCAGU | -7.04 | (17) |
| 463 | I101 | GAGaaGAG<br>CUCagCUC     | -5.39 | (22) |

|     |      |                      |       |      |
|-----|------|----------------------|-------|------|
| 464 | I102 | GAGagGAG<br>CUCgaCUC | -5.92 | (22) |
| 465 | I103 | GAGugGAG<br>CUCuaCUC | -4.37 | (22) |
| 466 | I104 | GAGcgGAG<br>CUCaaCUC | -5.99 | (22) |
| 467 | I105 | GAGagGAG<br>CUCcaCUC | -6.19 | (22) |
| 468 | I106 | GAGagGAG<br>CUCaaCUC | -5.23 | (22) |
| 469 | I107 | GAGguGAG<br>CUCauCUC | -4.77 | (22) |
| 470 | I108 | GAGauGAG<br>CUCguCUC | -3.88 | (22) |
| 471 | I109 | GAGuuGAG<br>CUCuuCUC | -5.88 | (22) |
| 472 | I110 | GAGauGAG<br>CUCcuCUC | -4.96 | (22) |
| 473 | I111 | GAGauGAG<br>CUCauCUC | -3.85 | (22) |
| 474 | I112 | GAGaaGAG<br>CUCgcCUC | -4.49 | (22) |
| 475 | I113 | GAGuaGAG<br>CUCucCUC | -5.41 | (22) |
| 476 | I114 | GAGuuGAG<br>CUCucCUC | -5.10 | (22) |
| 477 | I115 | GAGacGAG<br>CUCguCUC | -4.69 | (22) |
| 478 | I116 | GAGgcGAG<br>CUCacCUC | -4.47 | (22) |
| 479 | I117 | GAGacGAG<br>CUCgcCUC | -4.53 | (22) |
| 480 | I118 | GAGucGAG<br>CUCucCUC | -5.31 | (22) |
| 481 | I119 | GAGacGAG<br>CUCccCUC | -3.34 | (22) |
| 482 | I120 | GAGacGAG<br>CUCacCUC | -3.03 | (22) |
| 483 | I121 | GAGgcGAG<br>CUCaaCUC | -5.14 | (22) |
| 484 | I122 | GAGacGAG<br>CUCgaCUC | -4.81 | (22) |



|     |      |                      |       |      |
|-----|------|----------------------|-------|------|
| 485 | I123 | GAGucGAG<br>CUCuaCUC | -5.24 | (22) |
| 486 | I124 | GAGacGAG<br>CUCcaCUC | -4.14 | (22) |
| 487 | I125 | GAGacGAG<br>CUCaaCUC | -4.58 | (22) |
| 488 | I126 | GAGgaGAG<br>CUCaaCUC | -5.55 | (22) |
| 489 | I127 | GAGaaGAG<br>CUCgaCUC | -4.90 | (22) |
| 490 | I128 | GAGuaGAG<br>CUCuaCUC | -3.77 | (22) |
| 491 | I129 | GAGaaGAG<br>CUCaaCUC | -4.71 | (22) |
| 492 | I130 | GGAggUCC<br>CCUgaAGG | -4.64 | (43) |
| 493 | I131 | GGUagACC<br>CCAgaUGG | -5.13 | (43) |
| 494 | I132 | GCAggUGC<br>CGUggACG | -4.43 | (25) |
| 495 | I133 | GCUggAGC<br>CGAggUCG | -4.26 | (25) |
| 496 | I134 | GUGgcGUG<br>CACguCAC | -5.30 | (25) |
| 497 | I135 | GAGcgGAG<br>CUCugCUC | -5.69 | (25) |
| 498 | I136 | GAGcgGAG<br>CUCagCUC | -5.70 | (25) |
| 499 | I137 | GAGgcGAG<br>CUCguCUC | -5.66 | (25) |
| 500 | I138 | CUGgaGUC<br>GACggCAG | -5.00 | (25) |
| 501 | I139 | GAGgcGAG<br>CUCgaCUC | -5.57 | (25) |
| 502 | I140 | CUGagGUC<br>GACggCAG | -5.11 | (25) |
| 503 | I141 | GUGgaGUG<br>CACgaCAC | -4.63 | (25) |
| 504 | I142 | GUGagGUG<br>CACagCAC | -4.49 | (25) |
| 505 | I143 | GAGguGAG<br>CUCgcCUC | -5.02 | (25) |

|     |      |                            |       |      |
|-----|------|----------------------------|-------|------|
| 506 | I144 | GAGugGAG<br>CUCcgCUC       | -4.98 | (25) |
| 507 | I145 | GAGguGAG<br>CUCguCUC       | -4.56 | (25) |
| 508 | I146 | GAGugGAG<br>CUCugCUC       | -3.86 | (25) |
| 509 | I147 | GAGuuGAG<br>CUCccCUC       | -3.54 | (22) |
| 510 | I148 | GAGcgGAG<br>CUCcaCUC       | -5.92 | (22) |
| 511 | I149 | GAGcaGAG<br>CUCagCUC       | -5.60 | (22) |
| 512 | I150 | CGCaaGCG<br>GCGaaCGC       | -5.44 | (17) |
| 513 | I151 | CCACg__CUCC<br>GGUGaaaGAGG | -9.65 | (24) |
| 514 | I152 | CGACg__GCAG<br>GCUGgaaCGUC | -8.34 | (24) |
| 515 | I153 | UCAGc__GUGA<br>AGUCaauCACU | -5.73 | (24) |
| 516 | I154 | CGACa__GCAG<br>GCUGgaaCGUC | -8.01 | (24) |
| 517 | I155 | CCACa__CUCC<br>GGUGaaaGAGG | -9.18 | (24) |
| 518 | I156 | UCCGa__CGCA<br>AGGCaagGCGU | -9.02 | (24) |
| 519 | I157 | GGCu__CGG<br>CCGuuuGCC     | -6.03 | (24) |
| 520 | I158 | UGACu__CUCA<br>ACUGcuuGAGU | -6.77 | (24) |
| 521 | I159 | UCACu__CUGA<br>AGUGcucGACU | -5.30 | (24) |
| 522 | I160 | UGACa__CUCA<br>ACUGaacGAGU | -6.59 | (24) |
| 523 | I161 | UGAGa__GUCA<br>ACUCcgaCAGU | -6.55 | (24) |
| 524 | I162 | UGACa__CUCA<br>ACUGaaaGAGU | -6.55 | (17) |
| 525 | I163 | UGACc__CUCA<br>ACUGcuuGAGU | -6.34 | (24) |
| 526 | I164 | AGGCu__CGGA<br>UCCGuuuGCCU | -9.25 | (24) |

|     |      |                                 |        |      |
|-----|------|---------------------------------|--------|------|
| 527 | I165 | UGAGa__GUCA<br>ACUCaaaCAGU      | -6.16  | (17) |
| 528 | I166 | UCCGa__CGCA<br>AGGCggaGCGU      | -8.13  | (24) |
| 529 | I167 | AAGGCu__CGGAA<br>UUCCGuuuGCCUU  | -11.60 | (24) |
| 530 | I168 | UCCUg__UGCA<br>AGGAgagACGU      | -6.99  | (24) |
| 531 | I169 | UCCUa__UGCA<br>AGGAgagACGU      | -6.63  | (24) |
| 532 | I170 | UCCUa__UGCA<br>AGGAaagACGU      | -6.56  | (24) |
| 533 | I171 | AAGGUc__UGGAA<br>UUCCAuuuACCUU  | -7.87  | (24) |
| 534 | I172 | UCCUg__UGCA<br>AGGAaaaACGU      | -6.17  | (24) |
| 535 | I173 | UCCUa__UGCA<br>AGGAgaaACGU      | -6.18  | (24) |
| 536 | I174 | UCCUa__UGCA<br>AGGAagaACGU      | -6.09  | (24) |
| 537 | I175 | UCCUa__UGCA<br>AGGAaaaACGU      | -6.09  | (24) |
| 538 | I176 | ACCUc__UUGC<br>UGGAacaAACG      | -5.02  | (24) |
| 539 | I177 | CCUCUc__GGUGA<br>GGAGAaaaCCGCU  | -9.86  | (24) |
| 540 | I178 | GAGUg__UGAC<br>CUCGaagGCUg      | -5.07  | (43) |
| 541 | I179 | GAGCga__CGAC<br>CUCGaagGCUg     | -10.51 | (24) |
| 542 | I180 | CCACgg__CUCC<br>GGUGagaGAGG     | -9.84  | (24) |
| 543 | I181 | GAGCaa__CGAC<br>CUCGaagGCUg     | -9.23  | (24) |
| 544 | I182 | CGACga__GCAG<br>GCUggaCGUC      | -8.44  | (24) |
| 545 | I183 | CCUCUgc__GGUGA<br>GGAGAaaaCCGCU | -11.57 | (24) |
| 546 | I184 | UGACuu__CUCA<br>ACUGuuuGAGU     | -7.36  | (24) |
| 547 | I185 | GAGCag__CGAC<br>CUCGgaaGCUg     | -8.80  | (24) |

|     |      |                            |       |      |
|-----|------|----------------------------|-------|------|
| 548 | I186 | GAGCga_CGAC<br>CUCGaaaGCUG | -8.77 | (24) |
| 549 | I187 | CCACgg_CUCC<br>GGUGaaaGAGG | -9.22 | (24) |
| 550 | I188 | GAGCaa_CGAC<br>CUCGgaaGCUG | -8.61 | (24) |
| 551 | I189 | UGACuu_CUCA<br>ACUGcuuGAGU | -6.99 | (24) |
| 552 | I190 | GAGCag_CGAC<br>CUCGaagGCUG | -8.50 | (24) |
| 553 | I191 | UCACuu_CUGA<br>AGUGcucGACU | -5.34 | (24) |
| 554 | I192 | ACCUgc_UUGC<br>UGGAacaAACG | -7.33 | (24) |
| 555 | I193 | UCAGcc_GUGA<br>AGUCaauCACU | -5.11 | (24) |
| 556 | I194 | UGAGaa_GUCA<br>ACUCaaaCAGU | -6.59 | (17) |
| 557 | I195 | UGAGaa_GUCA<br>ACUCcgaCAGU | -6.58 | (24) |
| 558 | I196 | GAGCag_CGAC<br>CUCGaaaGCUG | -8.14 | (24) |
| 559 | I197 | CUGUgg_ACGA<br>GACGagaUGCU | -5.45 | (24) |
| 560 | I198 | GAGCaa_CGAC<br>CUCGaaaGCUG | -7.99 | (24) |
| 561 | I199 | GAGUaa_CGAC<br>CUCGaagGCUG | -7.96 | (43) |
| 562 | I200 | GAGUga_UGAC<br>CUCGaagGCUG | -6.99 | (43) |
| 563 | I201 | GAGCaa_UGAC<br>CUCGaagGCUG | -7.48 | (43) |
| 564 | I202 | CUGUau_GACG<br>GACGaauCUGC | -6.58 | (43) |
| 565 | I203 | GAGUaa_CGAC<br>CUCGaaaGCUG | -6.62 | (43) |
| 566 | I204 | GAGUaa_UGAC<br>CUCGaagGCUG | -5.68 | (43) |
| 567 | I205 | GAGUga_UGAC<br>CUCGaaaGCUG | -5.52 | (43) |
| 568 | I206 | GAGCaa_UGAC<br>CUCGaaaGCUG | -6.23 | (43) |

|     |      |                               |       |      |
|-----|------|-------------------------------|-------|------|
| 569 | I207 | GAGUag_UGAC<br>CUCGaaaGCUG    | -4.79 | (43) |
| 570 | I208 | GAGUaa_UGAC<br>CUCGaaaGCUG    | -4.70 | (43) |
| 571 | I209 | UGACuuCUCA<br>ACUGccuGAGU     | -6.31 | (24) |
| 572 | I210 | CGACGa_GCAG<br>GCUGaagCGUC    | -9.77 | (44) |
| 573 | I211 | UGACa__CUCA<br>ACUGaaaaGAGU   | -6.12 | (17) |
| 574 | I212 | UGAGa__GUCA<br>ACUCaaaaCAGU   | -5.56 | (17) |
| 575 | I213 | UGAGaaaGUCA<br>ACUCaaaCAGU    | -6.67 | (17) |
| 576 | I214 | UGACaa__CUCA<br>ACUGaaaaGAGU  | -6.07 | (17) |
| 577 | I215 | UGAGaa__GUCA<br>ACUCaaaaCAGU  | -6.00 | (17) |
| 578 | I216 | UGACa___CUCA<br>ACUGaaaaaGAGU | -5.71 | (17) |
| 579 | I217 | UGAGa___GUCA<br>ACUCaaaaaCAGU | -5.30 | (17) |
| 580 | I218 | UGACcaaCUCA<br>ACUGaaaGAGU    | -7.14 | (17) |
| 581 | I219 | UGACaaaCUCA<br>ACUGaacGAGU    | -7.17 | (17) |
| 582 | I220 | CGCaaaGCG<br>GCGaaaCGC        | -4.88 | (17) |
| 583 | I221 | CGGaaaCCG<br>GCCaaaGGC        | -4.64 | (17) |
| 584 | I222 | GCGaaaCGC<br>CGCaaaGCG        | -4.27 | (26) |
| 585 | I223 | CGCaaaGGC<br>GCGaccCCG        | -5.85 | (26) |
| 586 | I224 | CGGaaaCGC<br>GCCaaaGCG        | -5.00 | (26) |
| 587 | I225 | CGCauaGGC<br>GCGaugCCG        | -6.05 | (26) |
| 588 | I226 | CGCauaGGC<br>GCGaaaCCG        | -6.14 | (26) |
| 589 | I227 | GAGUgaaUGAC<br>CUCAagaACUG    | -7.01 | (26) |

|     |      |                            |       |      |
|-----|------|----------------------------|-------|------|
| 590 | I228 | GAGCagaCGAC<br>CUCGagaGCUg | -8.36 | (26) |
| 591 | I229 | CGCagaGGC<br>GCGaugCCG     | -6.33 | (26) |
| 592 | I230 | GAGCguaCGAC<br>CUCGauaGCUg | -8.48 | (26) |
| 593 | I231 | CGCaaaGGC<br>GCGaugCCG     | -6.56 | (26) |
| 594 | I232 | GAGCagaCGAC<br>CUCGauaGCUg | -8.78 | (26) |
| 595 | I233 | GAGCagaCGAC<br>CUCGaugGCUg | -8.73 | (26) |
| 596 | I234 | CGGcacCCG<br>GCCcacGGC     | -4.70 | (26) |
| 597 | I235 | GAGCggaCGAC<br>CUCGauaGCUg | -8.89 | (26) |
| 598 | I236 | CGCaaaGGC<br>GCGaaaCCG     | -6.78 | (26) |
| 599 | I237 | GCAgaaUGC<br>CGUaagACG     | -4.58 | (26) |
| 600 | I238 | CGCucuGGC<br>GCGucuCCG     | -6.90 | (26) |
| 601 | I239 | GAGCaaaCGAC<br>CUCGaugGCUg | -9.12 | (26) |
| 602 | I240 | CGCaaaGGC<br>GCGaacCCG     | -6.98 | (26) |
| 603 | I241 | GAGCcgaCGAC<br>CUCGagaGCUg | -9.13 | (26) |
| 604 | I242 | CGACgcaGCAG<br>GCUGaaaGUC  | -8.43 | (26) |
| 605 | I243 | CGGacaCCG<br>GCCacaGGC     | -5.07 | (26) |
| 606 | I244 | GAGCugcCGAC<br>CUCGuauGCUg | -9.26 | (26) |
| 607 | I245 | GAGCcgaCGAC<br>CUCGauaGCUg | -9.23 | (26) |
| 608 | I246 | GAGCgaaCGAC<br>CUCGaaaGCUg | -9.32 | (26) |
| 609 | I247 | GCUgaaAGC<br>CGAaagUCG     | -5.13 | (26) |
| 610 | I248 | GAGCgaaCGAC<br>CUCGauaGCUg | -9.34 | (26) |

|     |      |                            |        |      |
|-----|------|----------------------------|--------|------|
| 611 | I249 | GAGCgagCGAC<br>CUCGauaGCUG | -9.45  | (26) |
| 612 | I250 | GGCgaaGCC<br>CCGaagCGG     | -7.74  | (26) |
| 613 | I251 | CGGaagCGC<br>GCCguaGCG     | -6.33  | (26) |
| 614 | I252 | GAGCgagCGAC<br>CUCGaaaGCUG | -9.60  | (26) |
| 615 | I253 | GAGCgagCGAC<br>CUCGaagGCUG | -9.64  | (26) |
| 616 | I254 | CGCgaaGGC<br>GCGaccCCG     | -7.48  | (26) |
| 617 | I255 | GAGCuguCGAC<br>CUCGuauGCUG | -9.72  | (26) |
| 618 | I256 | CGCgaaGGC<br>GCGaaaCCG     | -7.67  | (26) |
| 619 | I257 | CGGaagCGC<br>GCCgaaGCG     | -6.60  | (26) |
| 620 | I258 | GCGuuuCGC<br>CGCuuuGCG     | -6.46  | (26) |
| 621 | I259 | CGCucuGGC<br>GCGuuuCCG     | -7.83  | (26) |
| 622 | I260 | CGACgcaGCAG<br>GUCGaagCGUC | -9.22  | (26) |
| 623 | I261 | CGCuuuGGC<br>GCGucuCCG     | -7.85  | (26) |
| 624 | I262 | CGCaagGCG<br>GCGgaaCGC     | -6.02  | (26) |
| 625 | I263 | GCGgaaCGG<br>CGCaugGCC     | -6.65  | (26) |
| 626 | I264 | CGCuuuGGC<br>GCGuuuCCG     | -7.84  | (26) |
| 627 | I265 | CGCgaaGGC<br>GCGaugCCG     | -7.97  | (26) |
| 628 | I266 | GAGCgagCGAC<br>CUCGagaGCUG | -10.12 | (26) |
| 629 | I267 | CGCauaGGC<br>GCGaagCCG     | -7.98  | (26) |
| 630 | I268 | GCGgaaCGC<br>CGCaagGCG     | -6.75  | (26) |
| 631 | I269 | GCGguaCGG<br>CGCaugGCC     | -7.73  | (26) |

|     |      |                            |        |      |
|-----|------|----------------------------|--------|------|
| 632 | I270 | CGCaaaGGC<br>GCGaagCCG     | -8.26  | (26) |
| 633 | I271 | GAGCgaaCGAC<br>CUCGagaGCUg | -10.55 | (26) |
| 634 | I272 | CGCgaaGGC<br>GCGaagCCG     | -8.41  | (26) |
| 635 | I273 | GAGCgaaCGAC<br>CUCGaagGCUg | -10.75 | (26) |
| 636 | I274 | CGCgaaGGC<br>GCGaacCCG     | -8.65  | (26) |
| 637 | I275 | GAGCagaCGAC<br>CUCGaagGCUg | -10.98 | (26) |
| 638 | I276 | GAGCcgaCGAC<br>CUCGaagGCUg | -11.02 | (26) |
| 639 | I277 | CGCagaGGC<br>GCGaagCCG     | -9.01  | (26) |
| 640 | I278 | CGACcgaGCAG<br>GCUGaagGCUg | -10.55 | (26) |
| 641 | I279 | GAGCggaCGAC<br>CUCGaaaGCUg | -11.32 | (26) |
| 642 | I280 | CGCgaaGGC<br>GCGaggCCG     | -10.28 | (26) |
| 643 | I281 | GAGCggaCGAC<br>CUCGaagGCUg | -12.48 | (26) |
| 644 | I282 | GCgaGCG<br>GCGagCG         | -6.68  | (41) |
| 645 | I283 | GCaaGCG<br>GCGaaCG         | -4.20  | (41) |
| 646 | I284 | GCagGCG<br>GCGgaCG         | -6.33  | (41) |
| 647 | I285 | GCgaGC<br>CGagCG           | -4.01  | (41) |
| 648 | I286 | GCgaGCA<br>ACGagCG         | -6.78  | (41) |
| 649 | I287 | GCgaGCU<br>UCGagCG         | -5.84  | (41) |
| 650 | I288 | CAGgaCUG<br>GUCagGAC       | -6.13  | (18) |
| 651 | I289 | GAGgaCUC<br>CUCagGAG       | -7.00  | (18) |
| 652 | I290 | GCGgaCGC<br>CGCagGCG       | -9.66  | (18) |



|     |      |                          |       |      |
|-----|------|--------------------------|-------|------|
| 653 | I291 | GCUgaGGC<br>CGGagUCG     | -6.70 | (18) |
| 654 | I292 | GCGgaUGC<br>CGUagGCG     | -4.63 | (18) |
| 655 | I293 | GCUaaGGC<br>CGGaaUCG     | -4.71 | (19) |
| 656 | I295 | UGACu_CUCA<br>ACUGcuGAGU | -9.50 | (40) |
| 657 | I296 | UGAGa_GUCA<br>ACUCagCAGU | -8.74 | (40) |
| 658 | I297 | UGAGa_GUCA<br>ACUCggCAGU | -8.64 | (40) |
| 659 | I301 | CUGUgaUGAC<br>GACGagGCUG | -8.45 | (43) |
| 660 | I302 | GAGUaaCGAC<br>CUCGaaGCUG | -7.87 | (43) |
| 661 | I303 | GAGUgaUGAC<br>CUCGaaGCUG | -6.72 | (43) |
| 662 | I304 | GCGagUGC<br>CGUgaGCG     | -3.84 | (43) |
| 663 | I305 | GAGCaaUGAC<br>CUCGaaGCUG | -7.12 | (43) |
| 664 | I306 | CUGUagGCAG<br>GACGgaUGUC | -5.50 | (43) |
| 665 | I307 | GAGUagUGAC<br>CUCGaaGCUG | -5.18 | (43) |
| 666 | I308 | GAGUaaUGAC<br>CUCGaaGCUG | -5.22 | (43) |

Supplementary Table 6: Multibranch Loop Duplex Experiment List

Note: The top strand is shown 5' to 3'. The bottom strand is shown 5' to 3'. Unpaired nucleotides are in lower case. The underscore character (\_) is used to delimit parts of the sequence that form different helices without intervening unpaired nucleotides.

| Index | ID# | Duplex                                     | Folding Free Energy Change (kcal/mol) | Reference |
|-------|-----|--------------------------------------------|---------------------------------------|-----------|
| 667   | M1  | GGAG_CGGCuucgGCCG_GACG<br>CGUCaaCUCC       | -5.42                                 | (45)      |
| 668   | M2  | GGAGaCGGCuucgGCCG_GACG<br>CGUCauaCUCC      | -4.05                                 | (45)      |
| 669   | M3  | GGAGaCGGCuucgGCCG_GCAG<br>CUGCauaCUCC      | -5.85                                 | (45)      |
| 670   | M4  | GGAGgCGGCuucgGCCGuGACG<br>CGUCcauaCUCC     | -6.01                                 | (45)      |
| 671   | M5  | GGAGaCGGCuucgGCCGcGACG<br>CGUCauaCUCC      | -4.78                                 | (45)      |
| 672   | M6  | GGAGgCGGCuucgGCCGuGACG<br>CGUCauaCUCC      | -6.17                                 | (45)      |
| 673   | M7  | GGAG_CGGCuucgGCCG_GACG<br>CGUC_CUCC        | -5.71                                 | (45)      |
| 674   | M8  | GGAGaCGGCuucgGCCG_GACG<br>CGUCcauaCUCC     | -4.59                                 | (45)      |
| 675   | M9  | GGAG_CGGCuucgGCCG_GACG<br>CGUCauaCUCC      | -5.43                                 | (45)      |
| 676   | M10 | GGAG_CGGCuucgGCCG_GACG<br>CGUCcauaCUCC     | -5.92                                 | (45)      |
| 677   | M11 | GGAGaCGGCuucgGCCGcGACG<br>CGUCcauaCUCC     | -5.25                                 | (45)      |
| 678   | M12 | GGAGaCGGCuucgGCCGaGACG<br>CGUCcauaCUCC     | -5.91                                 | (45)      |
| 679   | M13 | GGCAG_GCGCuucgGCGC_GGAGG<br>CCUCC_CUGCC    | -8.38                                 | (46)      |
| 680   | M14 | GGCAG_GCGCuucgGCGC_GGAGG<br>CCUCCaCUGCC    | -10.41                                | (46)      |
| 681   | M15 | GGCAG_GCGCuucgGCGC_GGAGG<br>CCUCCaaCUGCC   | -11.51                                | (46)      |
| 682   | M16 | GGCAG_GCGCuucgGCGC_GGAGG<br>CCUCCaaaCUGCC  | -11.48                                | (46)      |
| 683   | M17 | GGCAG_GCGCuucgGCGC_GGAGG<br>CCUCCauaCUGCC  | -12.88                                | (46)      |
| 684   | M18 | GGCAG_GCGCuucgGCGC_GGAGG<br>CCUCCaaaaCUGCC | -12.47                                | (46)      |
| 685   | M19 | GGCAGaGCGCuucgGCGC_GGAGG<br>CCUCC_CUGCC    | -8.80                                 | (46)      |
| 686   | M20 | GGCAGaGCGCuucgGCGC_GGAGG<br>CCUCCaCUGCC    | -10.54                                | (46)      |
| 687   | M21 | GGCAGaGCGCuucgGCGC_GGAGG<br>CCUCCaaCUGCC   | -11.13                                | (46)      |

|     |     |                                              |        |      |
|-----|-----|----------------------------------------------|--------|------|
| 688 | M22 | GGCAGaGCGCuucgGCGC_GGAGG<br>CCUCCaaaCUGCC    | -10.69 | (46) |
| 689 | M23 | GGCAGaGCGCuucgGCGC_GGAGG<br>CCUCCauaCUGCC    | -11.35 | (46) |
| 690 | M24 | GGCAGaGCGCuucgGCGC_GGAGG<br>CCUCCaaaaCUGCC   | -10.98 | (46) |
| 691 | M25 | GGCAGaaGCGCuucgGCGC_GGAGG<br>CCUCC_CUGCC     | -9.72  | (46) |
| 692 | M26 | GGCAGaaGCGCuucgGCGC_GGAGG<br>CCUCCaCUGCC     | -11.59 | (46) |
| 693 | M27 | GGCAGaaGCGCuucgGCGC_GGAGG<br>CCUCCaaCUGCC    | -11.86 | (46) |
| 694 | M28 | GGCAGaaGCGCuucgGCGC_GGAGG<br>CCUCCaaaCUGCC   | -11.26 | (46) |
| 695 | M29 | GGCAGaaGCGCuucgGCGC_GGAGG<br>CCUCCauaCUGCC   | -11.48 | (46) |
| 696 | M30 | GGCAGaaGCGCuucgGCGC_GGAGG<br>CCUCCaaaaCUGCC  | -10.97 | (46) |
| 697 | M31 | GGCAGaaGCGCuucgGCGCaGGAGG<br>CCUCC_CUGCC     | -11.66 | (46) |
| 698 | M32 | GGCAGaaGCGCuucgGCGCaGGAGG<br>CCUCCaCUGCC     | -12.89 | (46) |
| 699 | M33 | GGCAGaaGCGCuucgGCGCaGGAGG<br>CCUCCaaCUGCC    | -13.05 | (46) |
| 700 | M34 | GGCAGaaGCGCuucgGCGCaGGAGG<br>CCUCCaaaCUGCC   | -13.15 | (46) |
| 701 | M35 | GGCAGaaGCGCuucgGCGCaGGAGG<br>CCUCCauaCUGCC   | -12.93 | (46) |
| 702 | M36 | GGCAGaaGCGCuucgGCGCaGGAGG<br>CCUCCaaaaCUGCC  | -12.37 | (46) |
| 703 | M37 | GGCAGaaGCGCuucgGCGCaaGGAGG<br>CCUCC_CUGCC    | -12.50 | (46) |
| 704 | M38 | GGCAGaaGCGCuucgGCGCaaGGAGG<br>CCUCCaCUGCC    | -13.15 | (46) |
| 705 | M39 | GGCAGaaGCGCuucgGCGCaaGGAGG<br>CCUCCaaCUGCC   | -12.88 | (46) |
| 706 | M40 | GGCAGaaGCGCuucgGCGCaaGGAGG<br>CCUCCaaaCUGCC  | -12.64 | (46) |
| 707 | M41 | GGCAGaaGCGCuucgGCGCaaGGAGG<br>CCUCCauaCUGCC  | -13.23 | (46) |
| 708 | M42 | GGCAGaaGCGCuucgGCGCaaGGAGG<br>CCUCCaaaaCUGCC | -12.95 | (46) |
| 709 | M43 | GGCAG_UCGCuucgGCGA_GGAGG<br>CCUCC_CUGCC      | -9.15  | (46) |
| 710 | M49 | GGCAGaUCGCuucgGCGA_GGAGG<br>CCUCC_CUGCC      | -9.84  | (46) |
| 711 | M50 | GGCAGaUCGCuucgGCGA_GGAGG<br>CCUCCaCUGCC      | -11.79 | (46) |
| 712 | M51 | GGCAGaUCGCuucgGCGA_GGAGG<br>CCUCCaaCUGCC     | -12.38 | (46) |
| 713 | M52 | GGCAGaUCGCuucgGCGA_GGAGG                     | -12.00 | (46) |

|     |     |                                                          |        |      |
|-----|-----|----------------------------------------------------------|--------|------|
|     |     | CCUCCaaaCUGCC                                            |        |      |
| 714 | M53 | GGCAGaUCGCuucgGCCGA_GGAGG<br>CCUCCaauCUGCC               | -12.06 | (46) |
| 715 | M54 | GGCAGaUCGCuucgGCCGA_GGAGG<br>CCUCCaaaaCUGCC              | -11.91 | (46) |
| 716 | M55 | GGCAG_CGGCuucgGCCG_GCGCgcaaGCGC_GGAGG<br>CCUCC_CUGCC     | -16.48 | (46) |
| 717 | M56 | GGCAG_CGGCuucgGCCG_GCGCgcaaGCGC_GGAGG<br>CCUCCaCUGCC     | -13.90 | (46) |
| 718 | M57 | GGCAG_CGGCuucgGCCG_GCGCgcaaGCGC_GGAGG<br>CCUCCaaCUGCC    | -12.40 | (46) |
| 719 | M58 | GGCAG_CGGCuucgGCCG_GCGCgcaaGCGC_GGAGG<br>CCUCCaaaCUGCC   | -11.19 | (46) |
| 720 | M59 | GGCAG_CGGCuucgGCCG_GCGCgcaaGCGC_GGAGG<br>CCUCCaaaaCUGCC  | -10.46 | (46) |
| 721 | M60 | GGCAGaCGGCuucgGCCG_GCGCgcaaGCGC_GGAGG<br>CCUCC_CUGCC     | -13.12 | (46) |
| 722 | M61 | GGCAGaCGGCuucgGCCG_GCGCgcaaGCGC_GGAGG<br>CCUCCaCUGCC     | -15.40 | (46) |
| 723 | M62 | GGCAGaCGGCuucgGCCG_GCGCgcaaGCGC_GGAGG<br>CCUCCaaCUGCC    | -13.52 | (46) |
| 724 | M63 | GGCAGaCGGCuucgGCCG_GCGCgcaaGCGC_GGAGG<br>CCUCCaaaCUGCC   | -11.86 | (46) |
| 725 | M64 | GGCAGaCGGCuucgGCCG_GCGCgcaaGCGC_GGAGG<br>CCUCCaauCUGCC   | -12.31 | (46) |
| 726 | M65 | GGCAGaCGGCuucgGCCG_GCGCgcaaGCGC_GGAGG<br>CCUCCaaaaCUGCC  | -11.18 | (46) |
| 727 | M66 | GGCAGaCGGCuucgGCCG_GCGCgcaaGCGCaGGAGG<br>CCUCC_CUGCC     | -13.58 | (46) |
| 728 | M67 | GGCAGaCGGCuucgGCCG_GCGCgcaaGCGCaGGAGG<br>CCUCCaCUGCC     | -13.36 | (46) |
| 729 | M68 | GGCAGaCGGCuucgGCCG_GCGCgcaaGCGCaGGAGG<br>CCUCCaaCUGCC    | -14.76 | (46) |
| 730 | M69 | GGCAGaCGGCuucgGCCG_GCGCgcaaGCGCaGGAGG<br>CCUCCaaaCUGCC   | -13.01 | (46) |
| 731 | M70 | GGCAGaCGGCuucgGCCG_GCGCgcaaGCGCaGGAGG<br>CCUCCaauCUGCC   | -12.59 | (46) |
| 732 | M71 | GGCAGaCGGCuucgGCCG_GCGCgcaaGCGCaGGAGG<br>CCUCCaaaaCUGCC  | -12.66 | (46) |
| 733 | M72 | GGCAGaaCGGCuucgGCCGaaGCGCgcaaGCGCaaGGAGG<br>CCUCC_CUGCC  | -11.77 | (46) |
| 734 | M73 | GGCAGaaCGGCuucgGCCGaaGCGCgcaaGCGCaaGGAGG<br>CCUCCaCUGCC  | -12.65 | (46) |
| 735 | M74 | GGCAGaaCGGCuucgGCCGaaGCGCgcaaGCGCaaGGAGG<br>CCUCCaaCUGCC | -12.77 | (46) |

Supplementary Table 7: Bulge Loop Duplex Experiment List

Note: The top strand is shown 5' to 3'. The bottom strand is shown 3' to 5'. Lower case letters in the top strand indicate unpaired nucleotides. Lower case letters in the bottom strand indicate nucleotides that can base pair with multiple possible nucleotides in the top strand. The underscore character (\_) is used to maintain alignment between the top and bottom strands.

| Index | ID# | Duplex                     | Folding Free Energy Change (kcal/mol) | Reference |
|-------|-----|----------------------------|---------------------------------------|-----------|
| 736   | B1  | GCGaGCG<br>CGC_CGC         | -6.76                                 | (14)      |
| 737   | B2  | GCGuGCG<br>CGC_CGC         | -6.51                                 | (14)      |
| 738   | B3  | CGCaCGC<br>GCG_GCG         | -6.85                                 | (14)      |
| 739   | B4  | GCGaaGCG<br>CGC_CGC        | -5.17                                 | (14)      |
| 740   | B5  | GCGuuGCG<br>CGC_CGC        | -5.01                                 | (14)      |
| 741   | B6  | CGCaaCGC<br>GCG_GCG        | -5.33                                 | (14)      |
| 742   | B7  | GCGaaaGCG<br>CGC_CGC       | -4.76                                 | (14)      |
| 743   | B8  | GCGuuuGCG<br>CGC_CGC       | -4.85                                 | (14)      |
| 744   | B9  | CGCaaaCGC<br>GCG_GCG       | -6.63                                 | (14)      |
| 745   | B12 | GCGaaGCGa<br>aCGC_CGC      | -6.64                                 | (14)      |
| 746   | B13 | CGCaaCGCa<br>aGCG_GCG      | -7.16                                 | (14)      |
| 747   | B14 | GCGaaaGCGa<br>aCGC_CGC     | -5.39                                 | (14)      |
| 748   | B15 | CGCaaaCGCa<br>aGCG_GCG     | -7.38                                 | (14)      |
| 749   | B18 | GCGaaGUCa<br>aCGC_CAG      | -6.60                                 | (14)      |
| 750   | B19 | GCGaaaGUCa<br>aCGC_CAG     | -5.07                                 | (14)      |
| 751   | B20 | CCAUUaCUACC<br>GGUAA_GAUGG | -9.76                                 | (47)      |
| 752   | B21 | GCACaGAGG<br>CGUG_CUCC     | -9.07                                 | (47)      |

|     |     |                            |        |      |
|-----|-----|----------------------------|--------|------|
| 753 | B22 | GACCaUGUC<br>CUGG_ACAG     | -8.16  | (47) |
| 754 | B23 | UGAGaGUCA<br>ACUC_CAGU     | -7.82  | (47) |
| 755 | B24 | UGACaCUCA<br>ACUG_GAGU     | -7.17  | (47) |
| 756 | B25 | GACUaUGUC<br>CUGA_ACAG     | -6.06  | (47) |
| 757 | B26 | CAUGUgACUAC<br>GUACA_UGAUG | -8.89  | (47) |
| 758 | B27 | UGACgCUCA<br>ACUG_GAGU     | -7.57  | (47) |
| 759 | B28 | GACUgUGUC<br>CUGA_ACAG     | -7.40  | (47) |
| 760 | B29 | GACAgAGUC<br>CUGU_UCAG     | -6.63  | (47) |
| 761 | B30 | GCACuGAGG<br>CGUG_CUCC     | -9.63  | (47) |
| 762 | B31 | ACUGuGAGU<br>UGAC_CUCA     | -8.06  | (47) |
| 763 | B32 | UGACuCUCA<br>ACUG_GAGU     | -7.79  | (47) |
| 764 | B33 | GACAuAGUC<br>CUGU_UCAG     | -6.48  | (47) |
| 765 | B34 | CAUGAcGCUAC<br>GUACU_CGAUG | -10.58 | (47) |
| 766 | B35 | CAUGUcACUAC<br>GUACA_UGAUG | -8.61  | (47) |
| 767 | B36 | UGAGcGUCA<br>ACUC_CAGU     | -8.41  | (47) |
| 768 | B37 | GACUcUGUC<br>CUGA_ACAG     | -7.29  | (47) |
| 769 | B38 | UCCUcGAAC<br>AGGA_CUUG     | -6.69  | (47) |
| 770 | B39 | GACAcAGUC<br>CUGU_UCAG     | -5.93  | (47) |
| 771 | B40 | GACCaaGUC<br>CUGG_uCAG     | -9.40  | (47) |
| 772 | B41 | GACGaaGUC<br>CUGC_uCAG     | -8.24  | (47) |
| 773 | B42 | GACaaaGUC<br>CUG_uuCAG     | -6.87  | (47) |

|     |     |                        |       |      |
|-----|-----|------------------------|-------|------|
| 774 | B43 | AGCUggCAG<br>UCGA_cGUC | -9.56 | (47) |
| 775 | B44 | UGAgggUCA<br>ACU_ccAGU | -9.03 | (47) |
| 776 | B45 | AGCAggCAG<br>UCGU_cGUC | -8.59 | (47) |
| 777 | B46 | AGACggCAG<br>UCUG_cGUC | -8.07 | (47) |
| 778 | B47 | GACCuuGUC<br>CUGG_aCAG | -9.28 | (47) |
| 779 | B48 | GACuuuGUC<br>CUG_aaCAG | -7.25 | (47) |
| 780 | B49 | UGAcccUCA<br>ACU_ggAGU | -9.33 | (47) |
| 781 | B50 | UCCUccAAC<br>AGGA_gUUG | -8.41 | (47) |
| 782 | B51 | UCCAccAAC<br>AGGU_gUUG | -8.17 | (47) |
| 783 | B52 | CGGUaGUCU<br>GCCG_CAGA | -8.29 | (47) |
| 784 | B53 | UGAUaCUCA<br>ACUG_GAGU | -5.79 | (47) |

Supplementary Table 8: Coaxial Stacking Experiment List

Note: The top strand is shown 5' to 3'. The bottom strand is shown 3' to 5'. Unpaired nucleotides are in lower case. The top strand forms a hairpin loop whose stem can coaxially stack with the stem formed by base pairing with the bottom strand.

| Index | ID# | Duplex                              | Folding Free Energy Change (kcal/mol) | Reference |
|-------|-----|-------------------------------------|---------------------------------------|-----------|
| 785   | X1  | GGACGCAGUGGCaaaaaGCCACUG<br>CCUGA   | -7.79                                 | (48)      |
| 786   | X2  | GGACGCAGUGGCaaaaaGCCACUGA<br>CCUG   | -6.28                                 | (48)      |
| 787   | X3  | GGACGAGUGGCgcaaGCCACU<br>CCUGA      | -7.41                                 | (48)      |
| 788   | X4  | GGACGAGUGGCgcaaGCCACUA<br>CCUG      | -5.87                                 | (48)      |
| 789   | X5  | GGACGAGUGGCgcaaGCCACGA<br>CCUG      | -5.69                                 | (48)      |
| 790   | X6  | GGACGAGUGGCgcaaGCCACGA<br>CCUGA     | -6.67                                 | (48)      |
| 791   | X7  | GGACACAGUGGCaaaaaGCCACUG<br>CCUGG   | -7.79                                 | (48)      |
| 792   | X8  | GGAGCCAGUGGCaaaaaGCCACUG<br>CCUCC   | -5.64                                 | (48)      |
| 793   | X9  | GGACCCAGUGGCaaaaaGCCACUG<br>CCUGC   | -6.41                                 | (48)      |
| 794   | X10 | GGACGCAGUGGCaaaaaGCCACUGp<br>CCUGAa | -6.34                                 | (48)      |
| 795   | X11 | GGACGCAGUGGCaaaaaGCCACUGaa<br>CCUGA | -6.18                                 | (48)      |
| 796   | X12 | GGACGCAGUGGCaaaaaGCCACUGpa<br>CCUGA | -6.50                                 | (48)      |
| 797   | X13 | GGACGCAGUGGCaaaaaGCCACUGAa<br>CCUGp | -5.64                                 | (48)      |
| 798   | X14 | GGACGCAGUGGCaaaaaGCCACUGAgg<br>CCUG | -5.43                                 | (48)      |
| 799   | X15 | GGACGAGUGGCgcaaGCCACUaa<br>CCUGA    | -6.08                                 | (48)      |
| 800   | X16 | GGACGAGUGGCgcaaGCCACGp<br>CCUGAa    | -6.22                                 | (48)      |
| 801   | X17 | GGAGCCAGUGGCaaaaaGCCACUGa<br>CCUCCa | -5.12                                 | (48)      |



|     |     |                                     |       |      |
|-----|-----|-------------------------------------|-------|------|
| 802 | X18 | GGACCCAGUGGCaaaaaGCCACUGa<br>CCUGCa | -5.66 | (48) |
|-----|-----|-------------------------------------|-------|------|

#### References:

1. Xia, T., SantaLucia, J., Jr., Burkard, M.E., Kierzek, R., Schroeder, S.J., Jiao, X., Cox, C. and Turner, D.H. (1998) Thermodynamic parameters for an expanded nearest-neighbor model for formation of RNA duplexes with Watson-Crick base pairs. *Biochemistry*, **37**, 14719-14735.
2. Nelson, J.W., Martin, F.H. and Tinoco, I., Jr. (1981) DNA and RNA oligomer thermodynamics: the effect of mismatched bases on double-helix stability. *Biopolymers*, **20**, 2509-2531.
3. Petersheim, M. and Turner, D.H. (1983) Base-stacking and base-pairing contributions to helix stability: thermodynamics of double-helix formation with CCGG, CCGGp, CCGGAp, ACCGGp, CCGGUp, and ACCGGUp. *Biochemistry*, **22**, 256-263.
4. Freier, S.M., Petersheim, M., Hickey, D.R. and Turner, D.H. (1984) Thermodynamic studies of RNA stability. *J Biomol Struct Dyn*, **1**, 1229-1242.
5. Freier, S.M., Alkema, D., Sinclair, A., Neilson, T. and Turner, D.H. (1985) Contributions of dangling end stacking and terminal base-pair formation to the stabilities of XGGCCp, XCCGGp, XGGCCYp, and XCCGGYp helices. *Biochemistry*, **24**, 4533-4539.
6. Freier, S.M., Sinclair, A., Neilson, T. and Turner, D.H. (1985) Improved free energies for G.C base-pairs. *J Mol Biol*, **185**, 645-647.
7. Sugimoto, N., Kierzek, R., Freier, S.M. and Turner, D.H. (1986) Energetics of internal GU mismatches in ribooligonucleotide helices. *Biochemistry*, **25**, 5755-5759.
8. Freier, S.M., Kierzek, R., Caruthers, M.H., Neilson, T. and Turner, D.H. (1986) Free energy contributions of G.U and other terminal mismatches to helix stability. *Biochemistry*, **25**, 3209-3213.
9. Freier, S.M., Kierzek, R., Jaeger, J.A., Sugimoto, N., Caruthers, M.H., Neilson, T. and Turner, D.H. (1986) Improved free-energy parameters for predictions of RNA duplex stability. *Proc Natl Acad Sci U S A*, **83**, 9373-9377.
10. Kierzek, R., Caruthers, M.H., Longfellow, C.E., Swinton, D., Turner, D.H. and Freier, S.M. (1986) Polymer-supported RNA synthesis and its application to test the nearest-neighbor model for duplex stability. *Biochemistry*, **25**, 7840-7846.
11. Freier, S.M., Sugimoto, N., Sinclair, A., Alkema, D., Neilson, T., Kierzek, R., Caruthers, M.H. and Turner, D.H. (1986) Stability of XGCGCp, GCGCYp, and XGCGCYp helices: an empirical estimate of the energetics of hydrogen bonds in nucleic acids. *Biochemistry*, **25**, 3214-3219.
12. Sugimoto, N., Kierzek, R. and Turner, D.H. (1987) Sequence dependence for the energetics of dangling ends and terminal base pairs in ribonucleic acid. *Biochemistry*, **26**, 4554-4558.
13. Sugimoto, N., Kierzek, R. and Turner, D.H. (1987) Sequence dependence for the energetics of terminal mismatches in ribooligonucleotides. *Biochemistry*, **26**, 4559-4562.
14. Longfellow, C.E., Kierzek, R. and Turner, D.H. (1990) Thermodynamic and spectroscopic study of bulge loops in oligoribonucleotides. *Biochemistry*, **29**, 278-285.
15. He, L., Kierzek, R., SantaLucia, J., Jr., Walter, A.E. and Turner, D.H. (1991) Nearest-neighbor parameters for G.U mismatches: [formula; see text] is destabilizing in the contexts [formula; see text] and [formula; see text] but stabilizing in [formula; see text]. *Biochemistry*, **30**, 11124-11132.

16. Hall, K.B. and McLaughlin, L.W. (1991) Thermodynamic and structural properties of pentamer DNA.DNA, RNA.RNA, and DNA.RNA duplexes of identical sequence. *Biochemistry*, **30**, 10606-10613.
17. Peritz, A.E., Kierzek, R., Sugimoto, N. and Turner, D.H. (1991) Thermodynamic study of internal loops in oligoribonucleotides: symmetric loops are more stable than asymmetric loops. *Biochemistry*, **30**, 6428-6436.
18. Walter, A.E., Wu, M. and Turner, D.H. (1994) The stability and structure of tandem GA mismatches in RNA depend on closing base pairs. *Biochemistry*, **33**, 11349-11354.
19. Wu, M., McDowell, J.A. and Turner, D.H. (1995) A periodic table of symmetric tandem mismatches in RNA. *Biochemistry*, **34**, 3204-3211.
20. McDowell, J.A. and Turner, D.H. (1996) Investigation of the structural basis for thermodynamic stabilities of tandem GU mismatches: solution structure of (rGAGGUCUC)<sub>2</sub> by two-dimensional NMR and simulated annealing. *Biochemistry*, **35**, 14077-14089.
21. McDowell, J.A., He, L., Chen, X. and Turner, D.H. (1997) Investigation of the structural basis for thermodynamic stabilities of tandem GU wobble pairs: NMR structures of (rGGAGUUC)<sub>2</sub> and (rGGAUGUCC)<sub>2</sub>. *Biochemistry*, **36**, 8030-8038.
22. Xia, T., McDowell, J.A. and Turner, D.H. (1997) Thermodynamics of nonsymmetric tandem mismatches adjacent to G.C base pairs in RNA. *Biochemistry*, **36**, 12486-12497.
23. Kierzek, R., Burkard, M.E. and Turner, D.H. (1999) Thermodynamics of single mismatches in RNA duplexes. *Biochemistry*, **38**, 14214-14223.
24. Schroeder, S.J. and Turner, D.H. (2000) Factors affecting the thermodynamic stability of small asymmetric internal loops in RNA. *Biochemistry*, **39**, 9257-9274.
25. Burkard, M.E., Xia, T. and Turner, D.H. (2001) Thermodynamics of RNA internal loops with a guanosine-guanosine pair adjacent to another noncanonical pair. *Biochemistry*, **40**, 2478-2483.
26. Chen, G., Znosko, B.M., Jiao, X. and Turner, D.H. (2004) Factors affecting thermodynamic stabilities of RNA 3 x 3 internal loops. *Biochemistry*, **43**, 12865-12876.
27. Santalucia, J., Kierzek, R. and Turner, D.H. (1991) Functional-Group Substitutions as Probes of Hydrogen-Bonding between Ga Mismatches in Rna Internal Loops. *J Am Chem Soc*, **113**, 4313-4322.
28. Serra, M.J., Axenson, T.J. and Turner, D.H. (1994) A model for the stabilities of RNA hairpins based on a study of the sequence dependence of stability for hairpins of six nucleotides. *Biochemistry*, **33**, 14289-14296.
29. Hickey, D.R. and Turner, D.H. (1985) Effects of terminal mismatches on RNA stability: thermodynamics of duplex formation for ACCGGGp, ACCGGAp, and ACCGGCp. *Biochemistry*, **24**, 3987-3991.
30. Giese, M.R., Betschart, K., Dale, T., Riley, C.K., Rowan, C., Sprouse, K.J. and Serra, M.J. (1998) Stability of RNA hairpins closed by wobble base pairs. *Biochemistry*, **37**, 1094-1100.
31. Dale, T., Smith, R. and Serra, M.J. (2000) A test of the model to predict unusually stable RNA hairpin loop stability. *RNA*, **6**, 608-615.
32. Serra, M.J., Barnes, T.W., Betschart, K., Gutierrez, M.J., Sprouse, K.J., Riley, C.K., Stewart, L. and Temel, R.E. (1997) Improved parameters for the prediction of RNA hairpin stability. *Biochemistry*, **36**, 4844-4851.
33. Groebe, D.R. and Uhlenbeck, O.C. (1988) Characterization of RNA hairpin loop stability. *Nucleic Acids Res*, **16**, 11725-11735.
34. Antao, V.P. and Tinoco, I., Jr. (1992) Thermodynamic parameters for loop formation in RNA and DNA hairpin tetraloops. *Nucleic Acids Res*, **20**, 819-824.
35. Serra, M.J., Lyttle, M.H., Axenson, T.J., Schadt, C.A. and Turner, D.H. (1993) RNA hairpin loop stability depends on closing base pair. *Nucleic Acids Res*, **21**, 3845-3849.

36. Shu, Z. and Bevilacqua, P.C. (1999) Isolation and characterization of thermodynamically stable and unstable RNA hairpins from a triloop combinatorial library. *Biochemistry*, **38**, 15369-15379.
37. Laing, L.G. and Hall, K.B. (1996) A model of the iron responsive element RNA hairpin loop structure determined from NMR and thermodynamic data. *Biochemistry*, **35**, 13586-13596.
38. Antao, V.P., Lai, S.Y. and Tinoco, I., Jr. (1991) A thermodynamic study of unusually stable RNA and DNA hairpins. *Nucleic Acids Res*, **19**, 5901-5905.
39. Proctor, D.J., Schaak, J.E., Bevilacqua, J.M., Falzone, C.J. and Bevilacqua, P.C. (2002) Isolation and characterization of a family of stable RNA tetraloops with the motif YNMG that participate in tertiary interactions. *Biochemistry*, **41**, 12062-12075.
40. Schroeder, S., Kim, J. and Turner, D.H. (1996) G.A and U.U mismatches can stabilize RNA internal loops of three nucleotides. *Biochemistry*, **35**, 16105-16109.
41. SantaLucia, J., Jr., Kierzek, R. and Turner, D.H. (1990) Effects of GA mismatches on the structure and thermodynamics of RNA internal loops. *Biochemistry*, **29**, 8813-8819.
42. SantaLucia, J., Jr., Kierzek, R. and Turner, D.H. (1991) Stabilities of consecutive A.C, C.C, G.G, U.C, and U.U mismatches in RNA internal loops: Evidence for stable hydrogen-bonded U.U and C.C.+ pairs. *Biochemistry*, **30**, 8242-8251.
43. Schroeder, S.J. and Turner, D.H. (2001) Thermodynamic stabilities of internal loops with GU closing pairs in RNA. *Biochemistry*, **40**, 11509-11517.
44. Schroeder, S.J., Fountain, M.A., Kennedy, S.D., Lukavsky, P.J., Puglisi, J.D., Krugh, T.R. and Turner, D.H. (2003) Thermodynamic stability and structural features of the J4/5 loop in a *Pneumocystis carinii* group I intron. *Biochemistry*, **42**, 14184-14196.
45. Diamond, J.M., Turner, D.H. and Mathews, D.H. (2001) Thermodynamics of three-way multibranch loops in RNA. *Biochemistry*, **40**, 6971-6981.
46. Mathews, D.H. and Turner, D.H. (2002) Experimentally derived nearest-neighbor parameters for the stability of RNA three- and four-way multibranch loops. *Biochemistry*, **41**, 869-880.
47. Znosko, B.M., Silvestri, S.B., Volkman, H., Boswell, B. and Serra, M.J. (2002) Thermodynamic parameters for an expanded nearest-neighbor model for the formation of RNA duplexes with single nucleotide bulges. *Biochemistry*, **41**, 10406-10417.
48. Kim, J., Walter, A.E. and Turner, D.H. (1996) Thermodynamics of coaxially stacked helices with GA and CC mismatches. *Biochemistry*, **35**, 13753-13761.
